# Supplementary material for: Multichromophoric perylene–iridium triad as a homogeneous photocatalyst for the efficient synthesis of tetrahydroquinoline derivatives
Source: Royal Society of Chemistry journal article supplement (doi:10.1039/d4qo02269f), 2024-12-11
Supplement: d4qo02269f1.pdf [file d4qo02269f1.pdf]

## **Multichromophoric Perylene Iridium Triad as a Homogeneous Photocatalyst for the Efficient Synthesis of Tetrahydroquinoline Derivatives**

Anita Kumari and Sanchita Sengupta\*

Department of Chemical Sciences, Indian Institute of Science Education and Research (IISER) Mohali, Knowledge City, Sector 81, P.O. Manauli, Mohali, Punjab, 140306, India.

\*Email. [sanchita@iisermohali.ac.in](mailto:sanchita@iisermohali.ac.in).

## Table of contents

|                                                 |     |
|-------------------------------------------------|-----|
| 1. Materials and Methods                        | S3  |
| 2. Synthesis                                    | S4  |
| 3. $^1\text{H}$ and $^{13}\text{C}$ NMR spectra | S7  |
| 4. Photophysical Characterization               | S10 |
| 5. Cyclic Voltammetry                           | S15 |
| 6. Photocatalysis                               | S17 |
| 7. References                                   | S30 |

## 1. Material and Methods

All chemicals and solvents were purchased from commercial suppliers (Sigma Aldrich, GLR, TCI Chemicals) and used without further purification. *N, N*-dimethylformamide (DMF) and dichloromethane (DCM) were dried over calcium hydride and distilled before use. Toluene was dried over sodium/benzophenone and distilled before use. Silica gel of mesh size 60-120 was used for column chromatography.

The  $^1\text{H}$  and  $^{13}\text{C}$  NMR spectra were recorded on a 400 MHz Bruker BiospinAvance III FT-NMR spectrometer, respectively with trimethylsilane (TMS) as an internal standard at room temperature. Chemical shift values were reported in parts per million (ppm). The solvent used were deuterated chloroform ( $\text{CDCl}_3$ ) (from Merck, Germany) and dimethyl sulfoxide- $\text{d}_6$  (DMSO- $\text{d}_6$ ) (from Eurisotop). The high-resolution mass spectra were recorded with Waters QTOF mass spectrometer. The software used for acquiring mass spectra was Flex Control, Bruker (USA) and the software used for analyzing mass spectra was Flex Analysis 3.1.

UV/Vis absorption was recorded at room temperature on a Cary 60 UV/Vis spectrophotometer using a quartz cuvette with 1 cm path length. Fluorescence spectra were recorded on Hitachi F7000 fluorescence spectrophotometer using FL Solutions software. The photoluminescence decay lifetimes were estimated by time-correlated single-photon counting (TCSPC) technique using a Deltaflex Modular Fluorescence Lifetime System (HORIBA Scientific) with nano-LED pulsed diode light source (510 nm).

Cyclic voltammetry measurements were conducted using a computer-controlled CHI6159E electrochemical workstation (CH Instruments, USA) in a conventional three-electrode single-compartment cell. The setup included a glassy carbon working electrode, an Ag/AgCl reference electrode with a 1M KCl solution, and a Pt wire counter electrode, operated at a scan rate of 0.1 V/s. A solution of tetrabutylammonium hexafluorophosphate (TBAHFP, 0.1 M) (Alfa

Aesar) dissolved in pre-dried DCM served as the supporting electrolyte. Prior to each measurement, the solutions were purged with nitrogen for 5 minutes. The concentrations of the prepared samples were approximately 0.1-0.3 mM, and the electrochemical potential was calibrated internally against the ferrocene/ferrocenium (Fc/Fc<sup>+</sup>) redox couple.

## 2. Synthesis

### Synthesis of compound **2**<sup>S1</sup>

A mixture of 4-amino-2-bromopyridine (200 mg, 1.15 mmol), phenylboronic acid (PhB(OH)<sub>2</sub>, 155 mg, 1.27 mmol), Pd(OAc)<sub>2</sub> (10 mg, 0.04 mmol) and H<sub>2</sub>O (25 mL) in a two-neck round-bottom flask (100 mL) was stirred under reflux at 100 °C under N<sub>2</sub>. Palladium black gradually formed when 100 °C was reached. After being cooled to room temperature, the reaction mixture was basified using 30% NaOH aqueous solution and then extracted with ethyl acetate. The combined organic phase was passed over anhydrous Na<sub>2</sub>SO<sub>4</sub> and the solvent was removed under vacuum and the pure product **2** was obtained after column chromatography in a solvent mixture of ethylacetate and hexane (5:95, v/v) with 87% yield.

**<sup>1</sup>H NMR of compound **2** (400 MHz, DMSO-d<sub>6</sub>) δ (ppm):** 8.08 (d, *J* = 8 Hz, 1 H), 7.91-7.89 (m, 2 H), 7.46 -7.41 (m, 2 H), 7.39-7.36 (m, 1 H), 6.99 (d, *J* = 2 Hz, 1 H), 6.45 (dd, *J* = 4 Hz, 1 H), 6.08 (s, 2 H).

### Synthesis of compound **4**<sup>S2</sup>

Compound **3** (50 mg, 0.07 mmol), **NMI** (115 mg, 0.24 mmol) and cesium carbonate (48 mg, 0.14 mmol) were dissolved in DMF and refluxed for 30 h under nitrogen. After cooling to room temperature, the reaction mixture was extracted with chloroform (2×50 mL) and passed over sodium sulphate. The isolation of compound **4** in pure form by column chromatography was challenging due to the strong adherence of the anhydride group of this compound to silica gel.

Although flash column chromatography was employed for purification, it was not possible to obtain compound **4** in pure form. Additionally, due to its limited solubility in organic solvents, acquiring its proton NMR spectra was not feasible. Consequently, the resulting crude compound **4** was used for subsequent reactions.

### Synthesis of compound **5**

Compounds **4** (50 mg, 0.07 mmol), **2** (40 mg, 0.23 mmol) and Zn(OAc)<sub>2</sub> (34 mg, 0.18 mmol) were dissolved in 5 mL of pyridine and heated to 100 °C. The reaction mixture was stirred for 48 h. Pyridine was removed under vacuum and the reaction mixture was extracted with chloroform (3 × 50 mL) and dried over sodium sulfate. Then the crude product was subjected to column chromatography on a silica column with chloroform/hexane (95:5, v/v) as the eluent to obtain compound **5** with 60% yield.

**<sup>1</sup>H NMR of compound 5 (400 MHz, CDCl<sub>3</sub>) δ (ppm):** 9.46-9.36 (m, 2 H), 8.92-8.89 (m, 1 H), 8.72-8.66 (m, 1 H), 8.61 (t, *J* = 8 Hz, 2 H), 8.55-8.46 (m, 6 H), 8.19-8.12 (m, 2 H), 8.05-8.02 (m, 2 H), 7.96 (s, 1 H), 7.7 (d, *J* = 12 Hz, 1 H), 7.71-7.66 (m, 2 H), 7.49-7.41 (m, 4 H), 7.38-7.33 (m, 4 H), 7.28 (d, *J* = 8 Hz, 2 H), 7.24-7.20 (m, 2 H), 4.38-4.33 (m, 4 H), 3.38 (t, *J* = 8 Hz, 8 H), 1.82-1.78 (m, 4 H), 1.66-1.58 (m, 8 H), 1.53-1.49 (m, 4 H), 1.29-1.25 (m, 24 H), 1.03-0.98 (m, 6 H), 0.84 (t, *J* = 8 Hz, 12 H).

### Synthesis of compound **6**

Compound **5** (10 mg, 0.006 mmol) and *p*-toluene sulfonic acid monohydrate (*p*-TsOH·H<sub>2</sub>O) (7 mg, 0.03 mmol) were dispersed in 2 mL of toluene. The reaction mixture was stirred at 110 °C for 12 h. After cooling, the precipitate was filtered and washed several times with water and dried. Subsequently, the precipitate was dissolved in the minimum amount of CHCl<sub>3</sub> and to this solution, MeOH was added to obtain the precipitate of the pure product. The red precipitate was collected by filtration and dried to afford the pure product with a yield of 62%.

**<sup>1</sup>H NMR of compound 6 (400 MHz, CDCl<sub>3</sub>) δ (ppm):** 9.68-9.60 (m, 2 H), 8.89 (d, *J* = 4 Hz, 1 H), 8.76 (d, *J* = 4 Hz, 2 H), 8.71 (s, 1 H), 8.68 (d, *J* = 8 Hz, 1 H), 8.62-8.58 (m, 2 H), 8.54 (d, *J* = 4 Hz, 1 H), 8.51 (s, 1 H), 8.49-8.46 (m, 2 H), 8.03-8.01 (m, 2 H), 7.76-7.75 (m, 1 H), 7.70-7.65 (m, 2 H), 7.48-7.39 (m, 8 H), 7.36 (s, 1 H), 7.35-7.32 (m, 2 H), 7.29-7.28 (m, 1 H), 7.23-7.20 (m, 2 H), 3.39 (t, *J* = 8 Hz, 8 H), 1.61 (s, 8 H), 1.29-1.25 (m, 24 H), 0.85 (t, 8 Hz, 12 H).

**<sup>13</sup>C NMR of compound 6 (100 MHz, CDCl<sub>3</sub>) δ (ppm):** 164.86, 164.25, 159.53, 156.38, 156.15, 151.07, 143.56, 134.63, 134.50, 133.08, 132.84, 131.77, 131.69, 131.52, 131.48, 130.92, 130.71, 129.48, 129.27, 128.90, 127.40, 127.33, 127.29, 127.23, 126.14, 125.25, 124.21, 123.21, 123.18, 123.14, 122.17, 120.98, 119.99, 116.80, 115.05, 114.99, 53.91, 31.69, 27.21, 26.97, 22.71, 14.12.

**MS (MALDI):** Calculated for C<sub>106</sub>H<sub>108</sub>ClIrN<sub>6</sub>O<sub>11</sub> [M+H]: 1848.6767; found 1848.6436

### Synthesis of compound Ir-triad 1

Compound **6** (10 mg, 0.006 mmol) was dissolved in 6 mL of dry DCM and purged with nitrogen for half an hour. [Cp\*IrCl<sub>2</sub>]<sub>2</sub> (6 mg 0.006 mmol) and NaOAc·3H<sub>2</sub>O (3 mg, 0.021 mmol) were added and the reaction mixture was stirred for 36 h at room temperature in dark conditions under nitrogen. The crude product was loaded in silica gel column and eluted with a mixture of acetone/DCM (80:20). The pure product was obtained after precipitation with the addition of hexane in the solution of the compound with 58% yield.

**<sup>1</sup>H NMR of compound Ir-triad 1 (400 MHz, CDCl<sub>3</sub>) δ (ppm):** 9.65 (d, *J* = 8 Hz, 1 H), 9.57 (d, *J* = 8 Hz, 1 H), 8.87 (t, *J* = 8 Hz, 1 H), 8.73-8.55 (m, 8 H), 8.53-8.44 (m, 5 H), 7.87-7.83 (m, 2 H), 7.68-7.61 (m, 2 H), 7.42 (t, *J* = 8 Hz, 3 H), 7.36-7.32 (m, 3 H), 7.23-7.16 (m, 4 H), 7.03- 6.96 (m, 1 H), 3.41-3.36 (m, 8 H), 1.72 (s, 15 H), 1.61 (s, 8 H), 1.28-1.25 (m, 24 H), 0.85 (t, *J* = 8 Hz, 12 H).

**$^{13}\text{C}$  NMR of Ir-triad 1 (100 MHz,  $\text{CDCl}_3$ )  $\delta$  (ppm):** 169.10, 164.88, 164.82, 164.28, 164.22, 164.19, 164.14, 162.74, 162.46, 161.73, 160.26, 156.33, 156.04, 155.12, 152.03, 143.85, 135.94, 134.99, 134.66, 134.41, 134.31, 133.06, 132.80, 131.69, 131.65, 131.62, 131.48, 131.43, 131.40, 131.36, 130.86, 130.82, 129.27, 129.10, 128.96, 127.20, 125.20, 124.60, 123.14, 122.75, 122.32, 120.05, 119.69, 119.55, 119.47, 118.67, 118.57, 116.79, 116.76, 115.01, 114.94, 88.97, 88.92, 53.87, 31.69, 29.84, 27.19, 26.97, 22.72, 14.14, 9.13.

**MS (MALDI):** Calculated for  $\text{C}_{95}\text{H}_{84}\text{N}_6\text{O}_{11}$   $[\text{M}+\text{H}]$ : 1485.6276; found 1485.6115.

### 3. $^1\text{H}$ and $^{13}\text{C}$ NMR

**$^1\text{H}$  NMR of compound 2 in  $\text{DMSO-d}_6$ .**

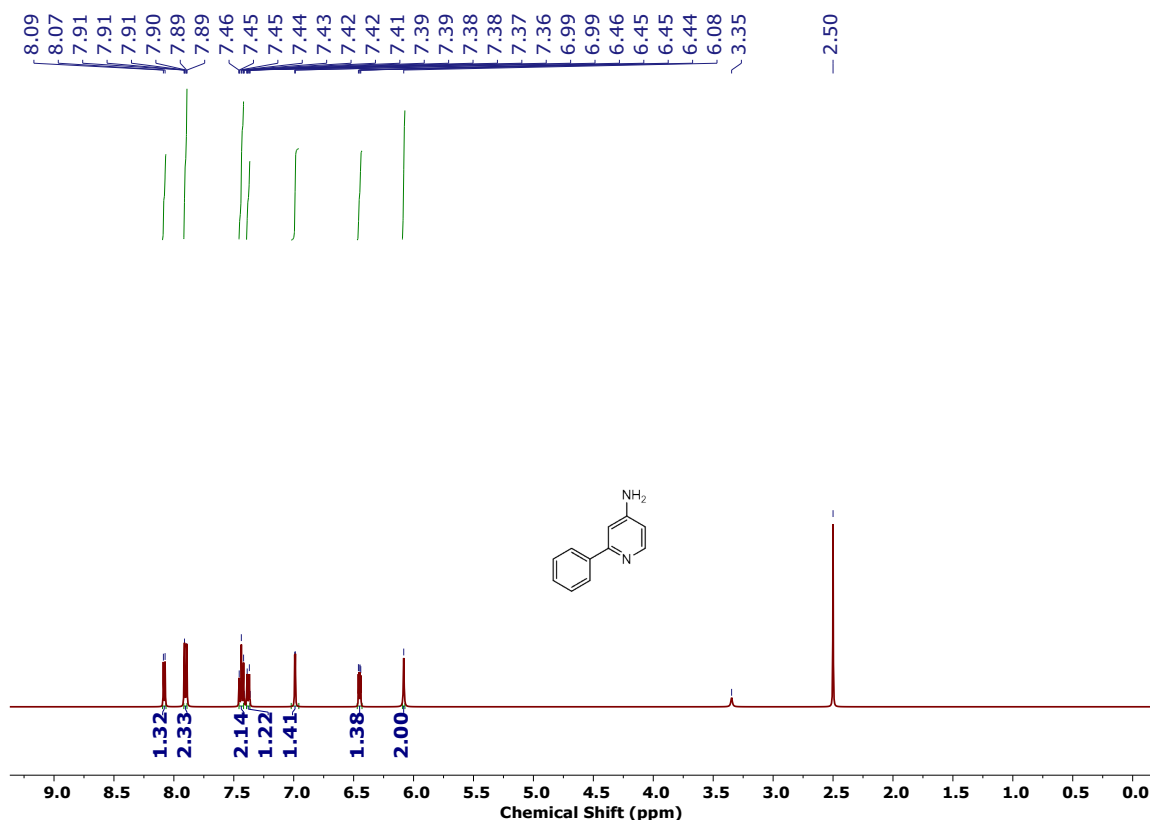





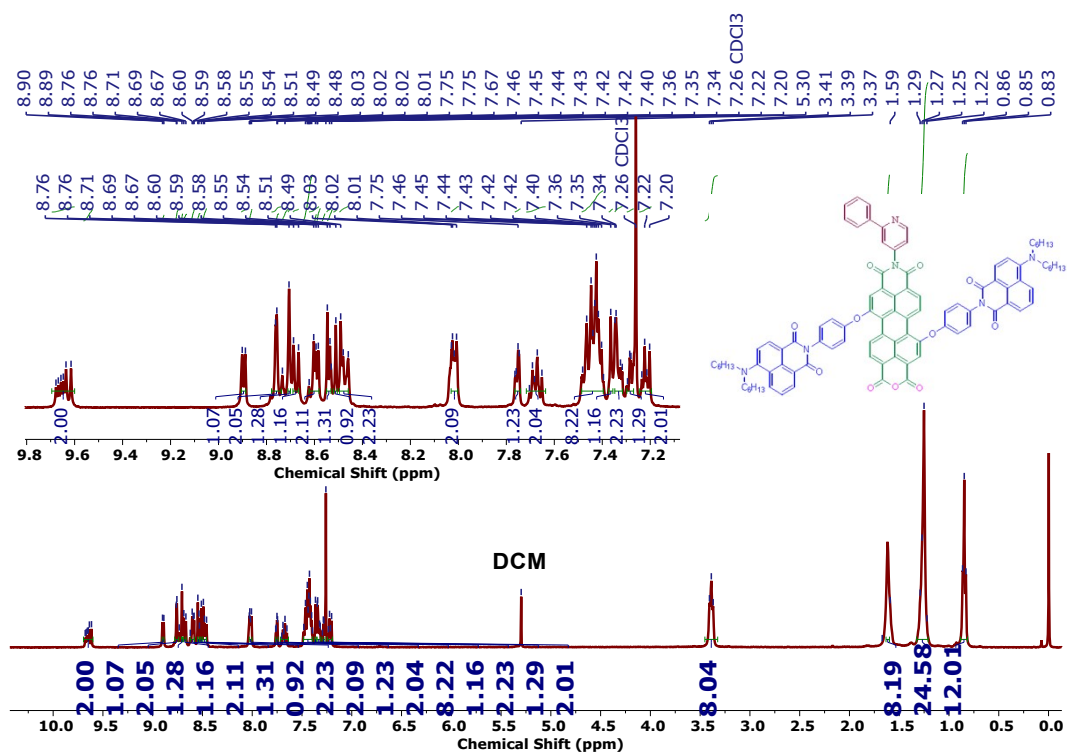

**<sup>13</sup>C NMR of compound 6 in CDCl<sub>3</sub>**

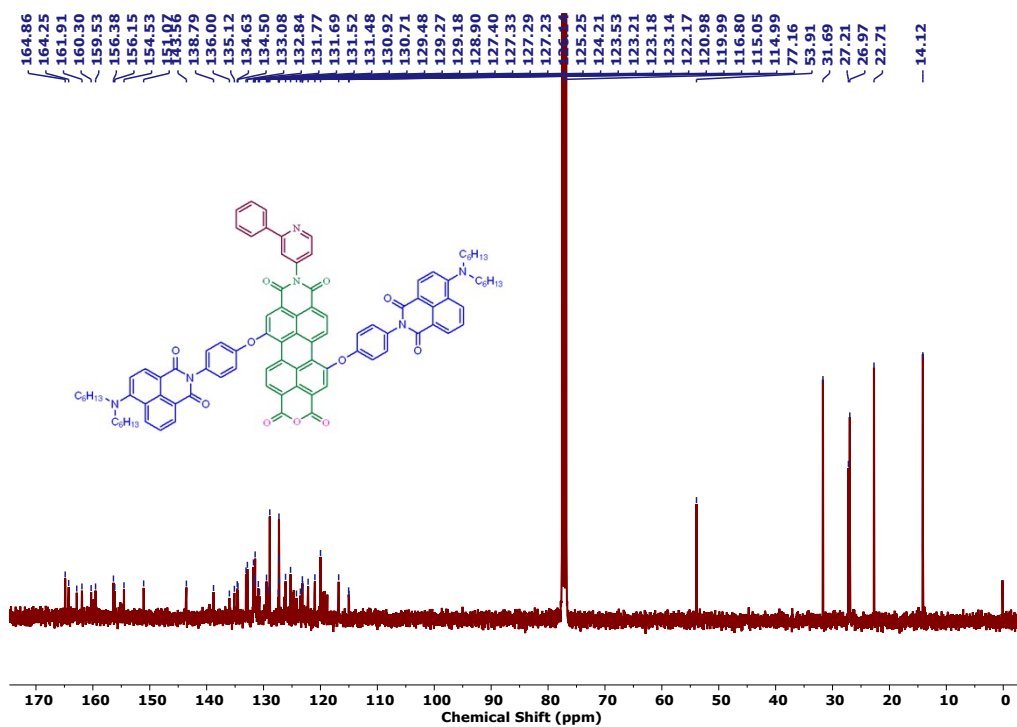

**<sup>1</sup>H NMR of Ir-triad 1 in CDCl<sub>3</sub>**

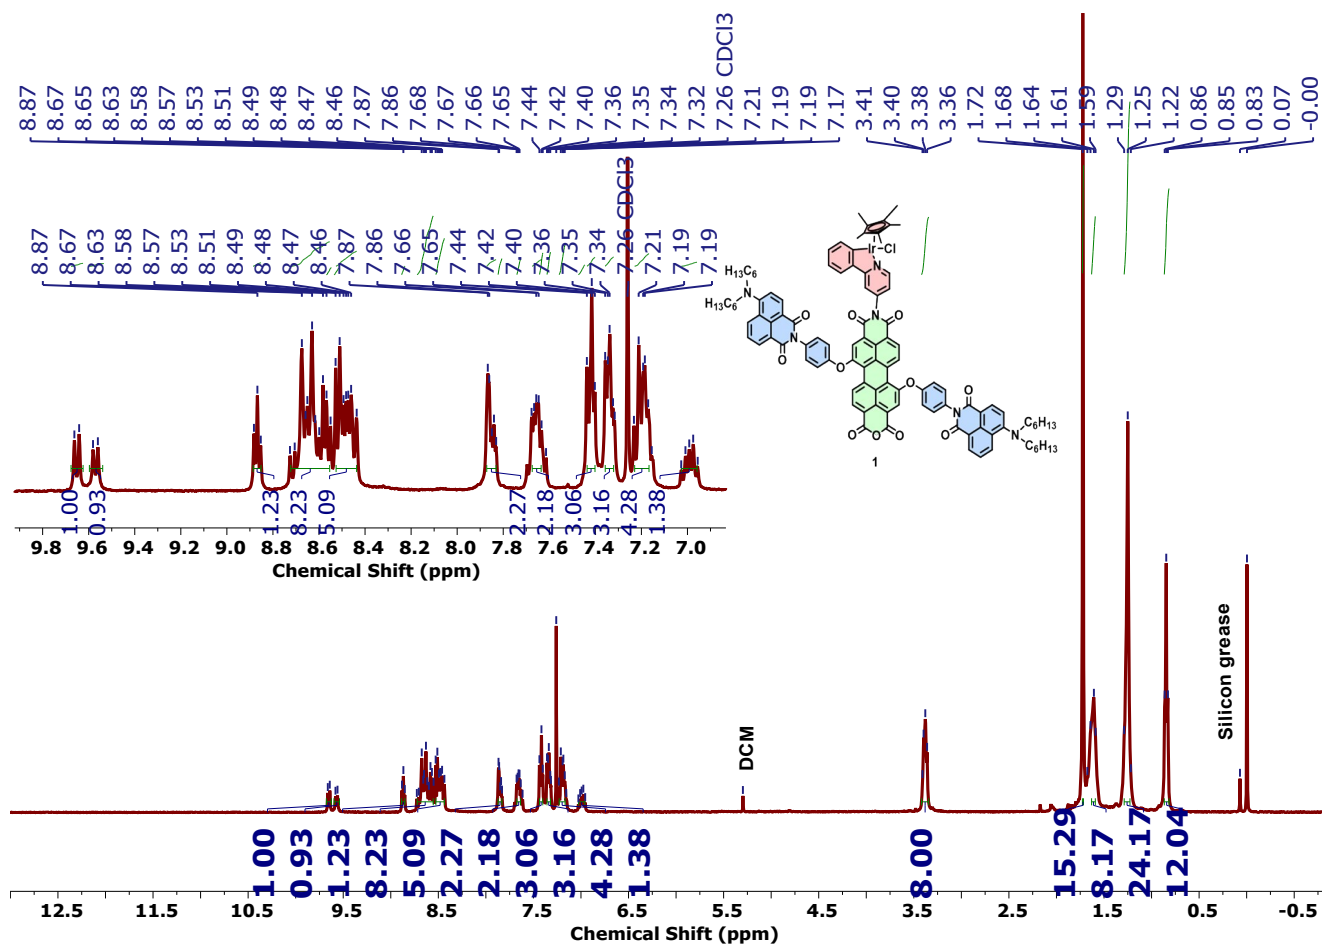

$^{13}\text{C}$  NMR of Ir-triad 1 in  $\text{CDCl}_3$

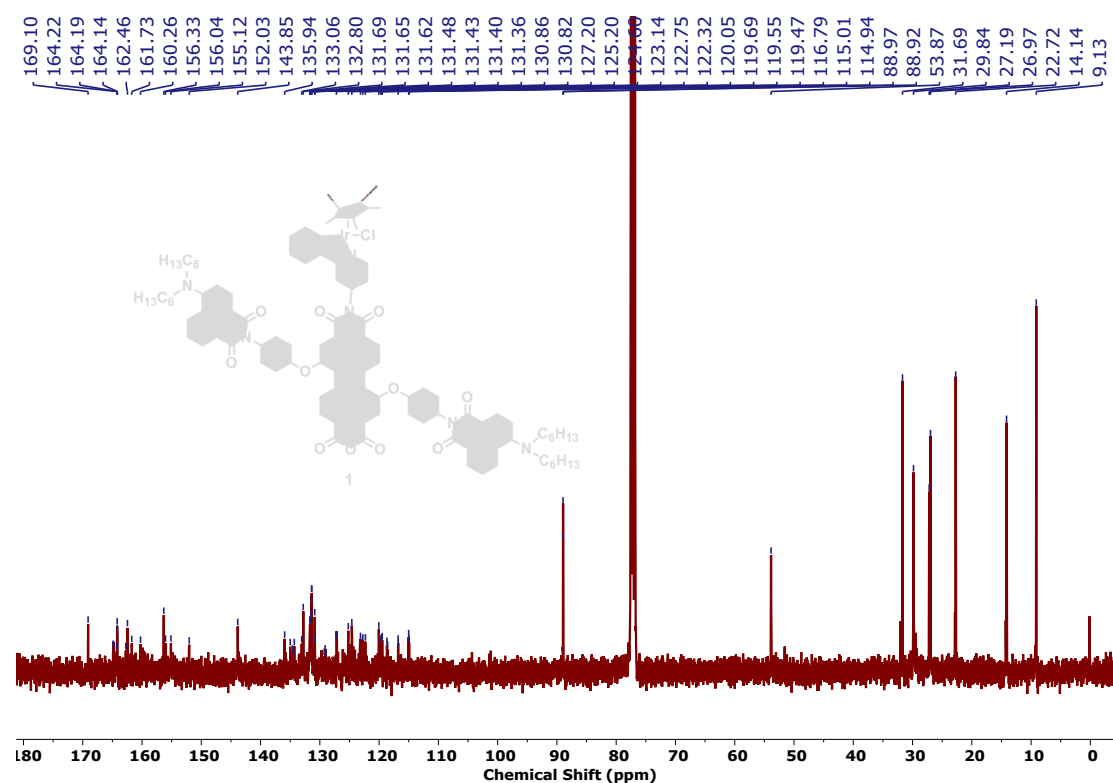

#### 4. Photophysical Characterization

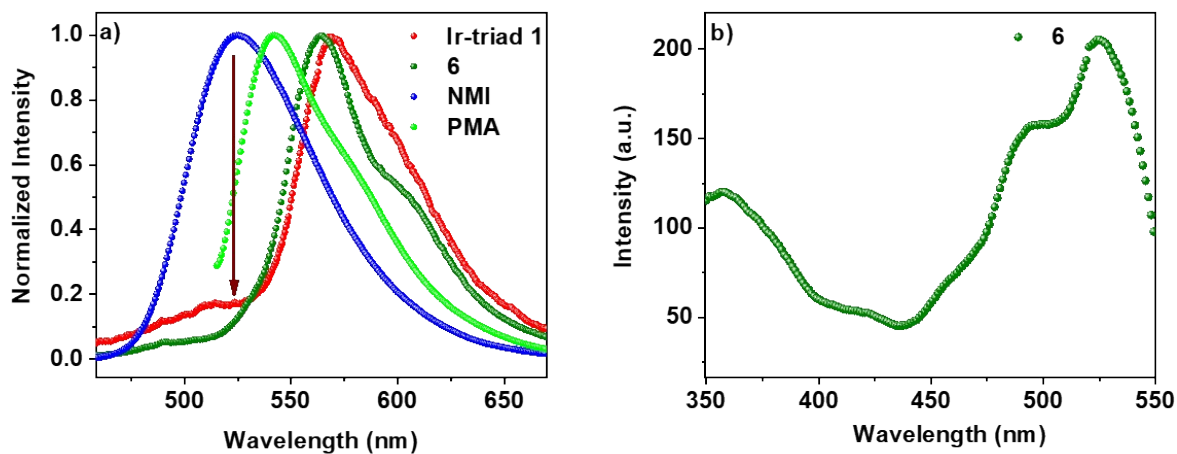

**Fig. S1** (a) Emission spectra of **Ir-triad 1**, **6** ( $\lambda_{\text{ex}} = 425 \text{ nm}$ ), NMI ( $\lambda_{\text{ex}} = 425 \text{ nm}$ ) and PMA ( $\lambda_{\text{ex}} = 505 \text{ nm}$ ), (b) Fluorescence excitation spectra of **6** recorded at an emission wavelength of PMI at 565 nm in DCM.

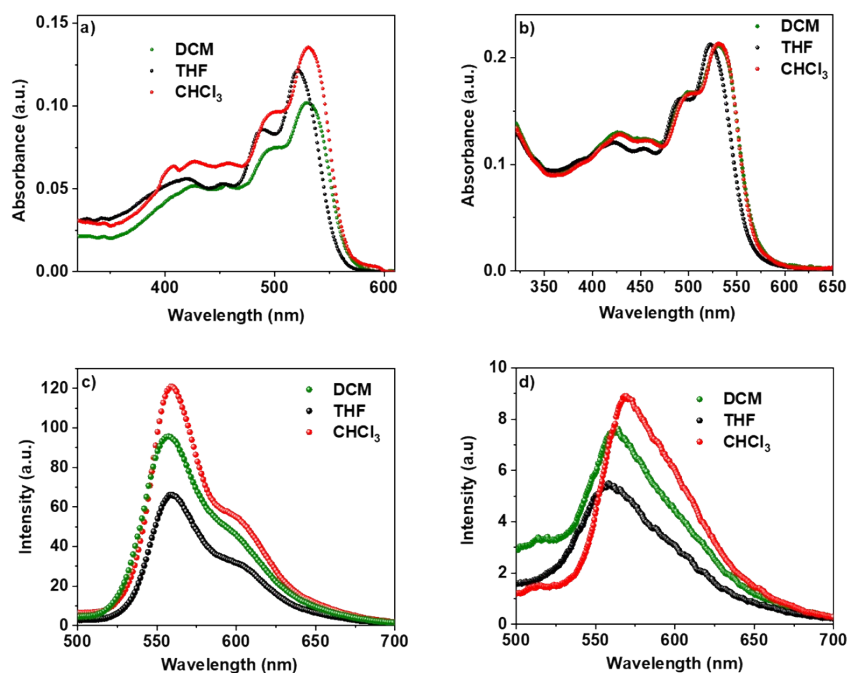

**Fig. S2** Absorption spectra of (a) **6** (b) **Ir-triad 1** and emission spectra of (c) **6** and (d) **Ir-triad 1** in solvents of different polarities.

### Fluorescence quantum yield

Fluorescence quantum yields of **Ir-triad 1** and **6** were performed using 4',6-Diamidino-2-Phenylindole, dihydrochloride (DAPI) ( $\Phi_R = 0.5$ ) in DMSO and Rhodamine B ( $\Phi_R = 0.5$ ) in ethanol as reference dyes using the following equation S1:<sup>S3</sup>

$$\Phi = \Phi_R (I/I_R) (A_R/A) (\lambda_{exR}/\lambda_{ex}) (n^2/n_R^2) \quad (S1)$$

where  $\Phi_R$  is the quantum yield of reference dyes,  $I$  and  $I_R$  are integrated fluorescence intensities of compounds and reference dyes respectively,  $A$  and  $A_R$  are the absorbances of the compounds and reference dyes respectively,  $n$  and  $n_R$  are the refractive index of solvent(s) used for compounds and reference respectively. All the compounds were dissolved in dichloromethane in three different concentrations ( $10^{-6}$  M) such that their absorbance was less than or equal to 0.1 and fluorescence spectra were recorded at excitation wavelengths of 425 nm and 532 nm. Absorbance and fluorescence spectra were recorded for three different concentrations of DAPI (excitation wavelength of 360 nm) in DMSO and Rhodamine B (excitation wavelength of 543

nm) at  $c \sim 10^{-5}$ - $10^{-6}$  M. The calculated fluorescent quantum yield values are shown in Table S1.

**Table S1** Relative quantum yields of **Ir-triad 1** and **6** using the comparative method and DAPI and Rhodamine B as reference dyes.

| Compound                 | Wavelength | Absorbance | Integrated PL intensity | Quantum Yield    |              |
|--------------------------|------------|------------|-------------------------|------------------|--------------|
|                          |            |            |                         | $\Phi_i$         | $\Phi_{avg}$ |
| NMI                      | 425        | 0.019      | 164.751                 | 0.327            | 0.377        |
|                          |            | 0.024      | 223.185                 | 0.377            |              |
|                          |            | 0.038      | 366.508                 | 0.382            |              |
| Ir-triad 1               | 425        | 0.0392     | 8.494                   | 0.0070           | 0.0071       |
|                          |            | 0.061      | 11.560                  | 0.0070           |              |
|                          |            | 0.0789     | 16.899                  | 0.0074           |              |
|                          | 532        | 0.0597     | 18.802                  | 0.024            | 0.025        |
|                          |            | 0.0899     | 25.921                  | 0.024            |              |
|                          |            | 0.123      | 37.880                  | 0.027            |              |
| DAPI<br>(DMSO)           | 360        | 0.0448     | 629.732                 | 0.58             |              |
|                          |            | 0.0707     | 867.144                 | (Reported)<br>S4 |              |
|                          |            | 0.0828     | 1086.253                | 0.0047           |              |
| 6                        | 425        | 0.035      | 5.078                   | 0.0080           | 0.006        |
|                          |            | 0.042      | 9.072                   | 0.0075           |              |
|                          |            | 0.062      | 13.321                  | 0.0424           |              |
|                          | 532        | 0.067      | 36.368                  | 0.0412           | 0.045        |
|                          |            | 0.095      | 45.344                  | 0.0536           |              |
|                          |            | 0.109      | 66.157                  | 0.5              |              |
| Rhodamine B<br>(ethanol) | 543        | 0.033      | 234.7                   | (Reported)<br>S5 |              |
|                          |            | 0.065      | 418.247                 |                  |              |
|                          |            | 0.105      | 655.361                 |                  |              |

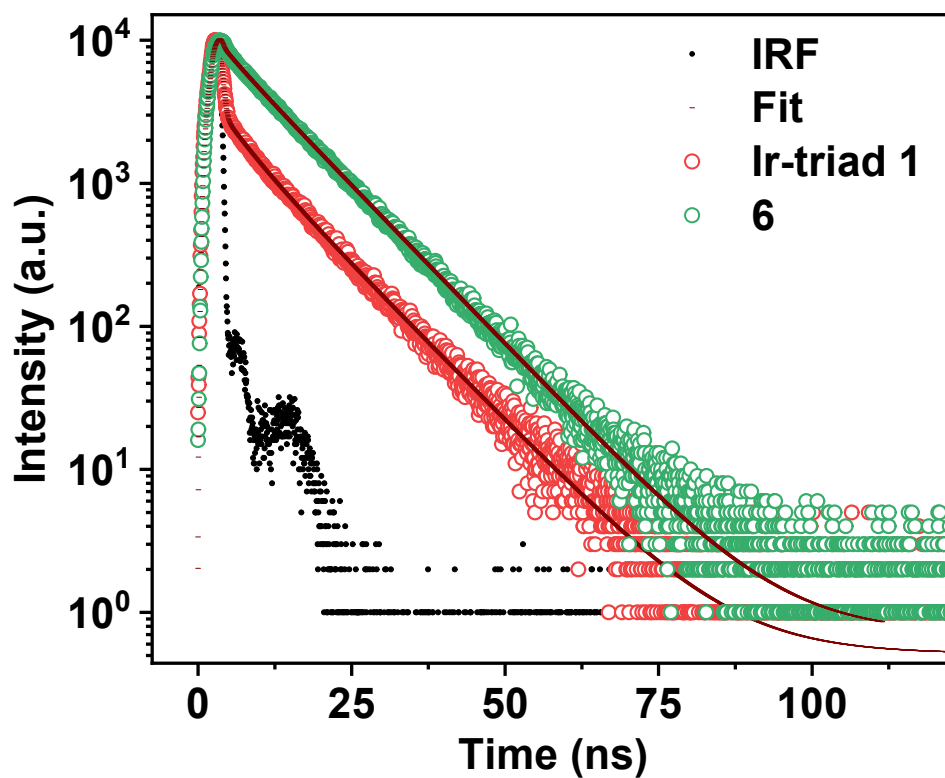

**Fig. S3** Fluorescence lifetime decay profiles of **Ir-triad 1** and **6** recorded in DCM.

**Table S2** Fluorescence lifetime parameters of **Ir-triad 1** and **6** at 510 nm excitation at different monitoring wavelengths in DCM.

| Compound          | Excitation Wavelength (nm) | Emission Wavelength (nm) | $\tau_1$ ( $a_1$ ) (ns) | $\tau_2$ ( $a_2$ ) (ns) | $\tau_3$ ( $a_3$ ) (ns) | $\tau_{\text{avg}}$ (ns) | $\chi^2$ |
|-------------------|----------------------------|--------------------------|-------------------------|-------------------------|-------------------------|--------------------------|----------|
| <b>Ir-triad 1</b> | 510                        | 569                      | 1.98                    | 4.65                    | 0.13                    | 0.34                     | 1.20     |
|                   |                            |                          | (0.02)                  | (0.04)                  | (0.94)                  |                          |          |
| <b>6</b>          | 510                        | 562                      | 1.51                    | 4.57                    | 0.072                   | 0.87                     | 1.20     |
|                   |                            |                          | (0.02)                  | (0.17)                  | (0.81)                  |                          |          |

**Table S3** Comparison table of photophysical characteristics of literature reported Ir-peryene complexes (Ir complexes attached at peri position of PMI/PDI are only listed).

| Compound                                                                | Ir Catalyst attached at imide site                         | $\lambda_{\text{abs}}$ (nm) | $\lambda_{\text{em}}$ (nm) | Fluorescence Lifetime                                                                                    | $\Phi_{\text{F}}$                              | Reference                                                                                 |
|-------------------------------------------------------------------------|------------------------------------------------------------|-----------------------------|----------------------------|----------------------------------------------------------------------------------------------------------|------------------------------------------------|-------------------------------------------------------------------------------------------|
| <b>Ir-triad 1</b>                                                       | <b>Cp*Ir (ppy)Cl</b>                                       | <b>425, 530</b>             | <b>569</b>                 | <b>0.34 ns</b>                                                                                           | <b>0.007 (425 nm)</b><br><b>0.025 (532 nm)</b> | <b>This work</b>                                                                          |
| <b>PDI-Ir (III)1</b>                                                    | Cp*Ir (ppy)Cl                                              | 553                         | 576                        | 3.9 ps                                                                                                   | –                                              | <i>Proc. Natl. Acad. Sci. U. S. A.</i> , 2012, <b>109</b> , 15651–15656 (Ref. 6 of paper) |
| <b>PDI-Ir (III)2</b>                                                    | Cp*Ir (ppy)Cl                                              | 544                         | 579                        | 1.5 ps                                                                                                   | –                                              | <i>Proc. Natl. Acad. Sci. U. S. A.</i> , 2012, <b>109</b> , 15651–15656 (Ref. 6 of paper) |
| <b>PDI-Ir (II) dyad (1)</b>                                             | [Ir(ppy) <sub>2</sub> (phen)]PF <sub>6</sub>               | 2.15, 2.31, 2.80 eV         | 2.00 eV, 619               | 2.89 ns ( $\lambda_{\text{abs}} = 360 \text{ nm}$ )<br>3.0 ns ( $\lambda_{\text{ex}} = 550 \text{ nm}$ ) | 0.12 (360 nm)<br>0.55 (550 nm)                 | <i>J. Phys. Chem. C</i> , 2009, <b>120</b> , 22831–22843 (Ref. 7 of paper)                |
| <b>NDI-PMI-Ir</b>                                                       | Cp*Ir (ppy)Cl                                              | 480, 506                    | -                          | 1.5 ps                                                                                                   | -                                              | <i>Chem. Sci.</i> , 2013, <b>4</b> , 3863–3873 (Ref. 11 of paper)                         |
| <b>NMI-PMI-Ir</b>                                                       | Cp*Ir (ppy)Cl                                              | 542 nm                      | 550                        | 3.4 ps                                                                                                   | -                                              | <i>Chem. Sci.</i> , 2013, <b>4</b> , 3863–3873 (Ref. 11 of paper)                         |
| <b>[(phen)<sub>2</sub>Ru (II) (pPDIp)] (PF<sub>6</sub>)<sub>2</sub></b> | [(phen) <sub>2</sub> Ru (II)PF <sub>6</sub> ) <sub>2</sub> | 450 (MLCT peak), 500, 525   | 600, 525                   | 10 ps (90%)<br>3.5 ns (10%) at 532 nm excitation                                                         | -                                              | <i>J. Phys. Chem. C</i> , 2016, <b>120</b> , 22831–22843 (Ref. 14 of paper)               |

## 5. Cyclic Voltammetry

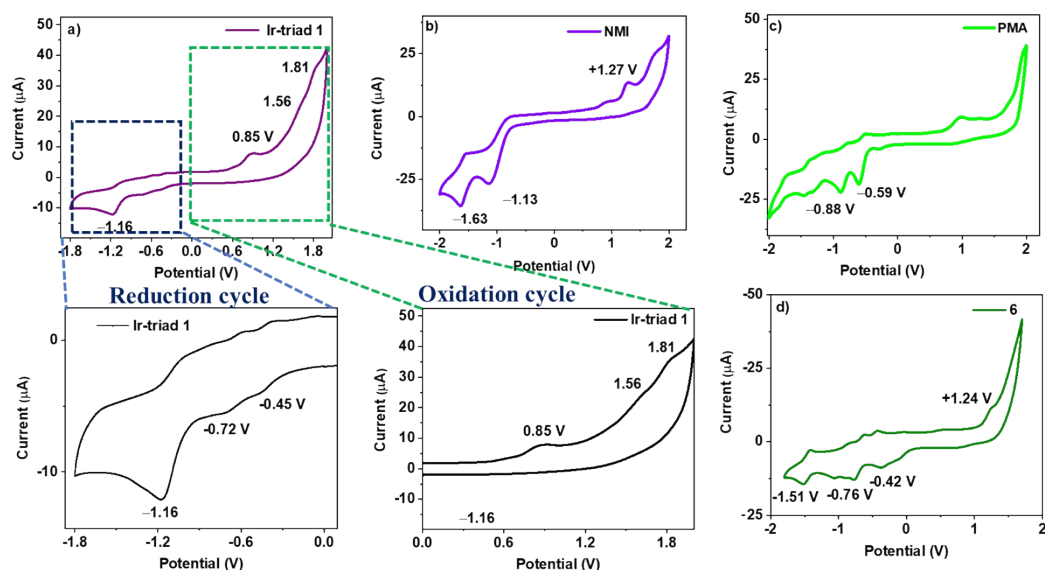

**Fig. S4** Cyclic voltammograms of (a) **Ir-triad 1** (b) **NMI** (c) **PMA** (d) **6** in dry DCM with 0.1 M TBAHFP and potentials measured vs Ag/AgCl as reference electrode.

**Table S4** Redox properties of **Ir-triad 1**, **6**, **NMI** and **PMA** based on cyclic voltammetry.

| Compound          | $E_{\text{ox onset}}(\text{V})$ | HOMO <sup>[a]</sup><br>(eV) | $E_{\text{red onset}}(\text{V})$ | LUMO <sup>[b]</sup><br>(eV) | $E_{\text{g}}^{\text{CV}}$<br>(eV) | $E_{\text{g}}^{\text{opt}}$<br>(eV) | $\lambda_{\text{onset}}$<br>(nm) |
|-------------------|---------------------------------|-----------------------------|----------------------------------|-----------------------------|------------------------------------|-------------------------------------|----------------------------------|
| <b>Ir-triad 1</b> | 0.64                            | -5.40                       | -0.47                            | -4.29                       | 1.11                               | 2.19                                | 566                              |
| <b>6</b>          | 1.09                            | -5.85                       | -0.48                            | -4.28                       | 1.57                               | 2.19                                | 565                              |
| <b>NMI</b>        | 1.4                             | -5.99                       | -0.81                            | -3.96                       | 2.03                               | 2.7                                 | 456                              |
| <b>PMA</b>        | -                               | -6.56                       | -0.46                            | -4.29                       | 2.27                               | 2.31                                | 535                              |

[a] HOMO =  $-(E_{\text{ox onset}} + 4.76)$  eV, [b] LUMO =  $-(E_{\text{red onset}} + 4.76)$  eV <sup>S6</sup>

To assess the feasibility of photoinduced electron transfer (PET), the Gibbs free energy for charge-separation ( $\Delta G_{\text{CS}}$ ) was calculated for compound **6** using the Rehm–Weller analysis in equation S2 <sup>S7</sup>

$$\Delta G_{\text{CS}} = e[E_{\text{ox}}(\text{NMI}) - E_{\text{red}}(\text{PMA})] - E_{00} - \frac{331}{\epsilon_s} r \quad (\text{S2})$$

where  $E_{\text{ox}}(\text{NMI})$  is the first oxidation potential of **NMI**,  $E_{\text{red}}(\text{PMA})$  is the first reduction potential of compound **PMA**,  $E_{00}$  is the energy of the  $S_0 \rightarrow S_1$  excited state,  $\epsilon_s$  is the dielectric



constant of the solvent used and  $r$  refers to the distance between the centers of the donor (**NMI**) and acceptor (**PMA**) segments.

The first oxidation potential of **NMI** = 1.27

The first reduction potential of **PMA** = -0.59

Centre-to-centre distance for compound **6** = 11.38 Å (estimated from the geometry-optimized structure using DFT calculations)

$E_{00}$  = 2.24 eV,  $\epsilon_s$  for DCM is 8.93

By using these values,  $\Delta G_{CS}$  was calculated to be -0.41 eV which is an indication of high feasibility of PET.

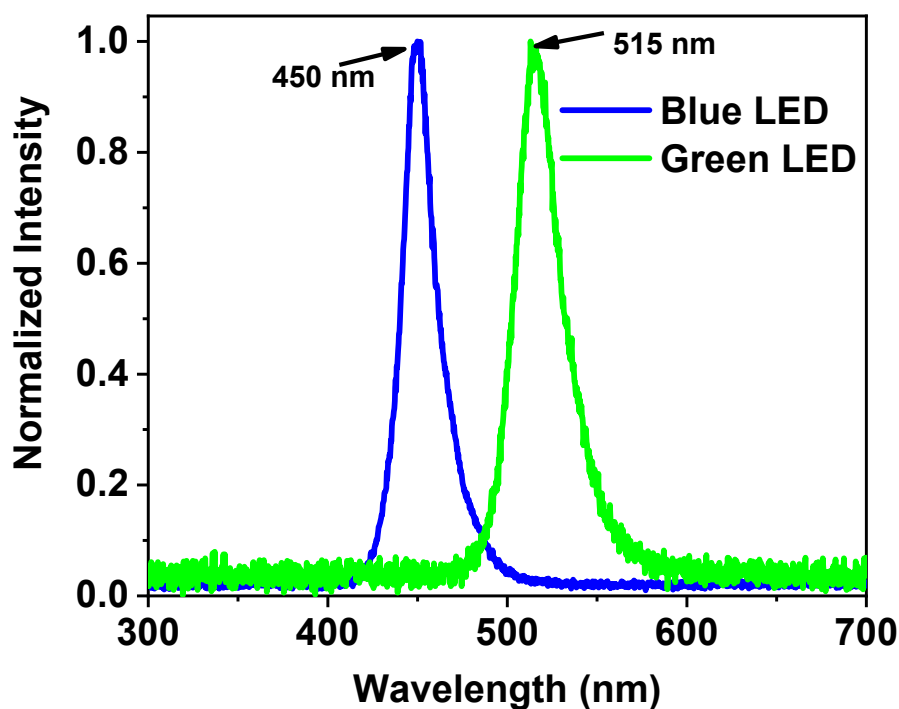

**Fig. S5** Spectra of blue and green LED light sources used in photocatalytic reactions.

#### **Fluorescence quenching experiment and Stern-Volmer plot:**

The Stern-Volmer relationship (equation S3) was established by taking the ratio of the integrated fluorescence intensities ( $I_0/I_n$ ) in the absence and presence of a quencher:

$$I_0/I_n = 1 + K_{SV} [Q] \quad (S3)$$

where  $I_0$  is the fluorescence intensity without the quencher (*N,N*-dimethylaniline),  $I$  is the fluorescence intensity in the presence of the quencher,  $[Q]$  is the concentration of added quencher and  $K_{SV}$  is the Stern-Volmer constant. The concentration of **Ir-triad 1** was  $3.6 \times 10^{-6}$  M and the concentration of quencher stock solution was 0.3 M. When the concentration of quencher was increased, the fluorescence intensity of **Ir-triad 1** was gradually decreased. Further, fluorescence intensity change with the quencher's concentration was plotted, and a straight line emerged with  $K_{SV}$  of  $29 \text{ M}^{-1}$  (Fig. S6b).

Further, the quenching rate constant ( $k_q$ ) was calculated using the following equation

$$K_{sv} = k_q \cdot \tau_0 \quad (\text{S4})$$

where  $\tau_0$  denotes the excited state lifetime of **Ir-triad 1**. Accordingly,  $k_q$  was calculated to be  $8.5 \times 10^{10} \text{ M}^{-1} \cdot \text{s}^{-1}$ .

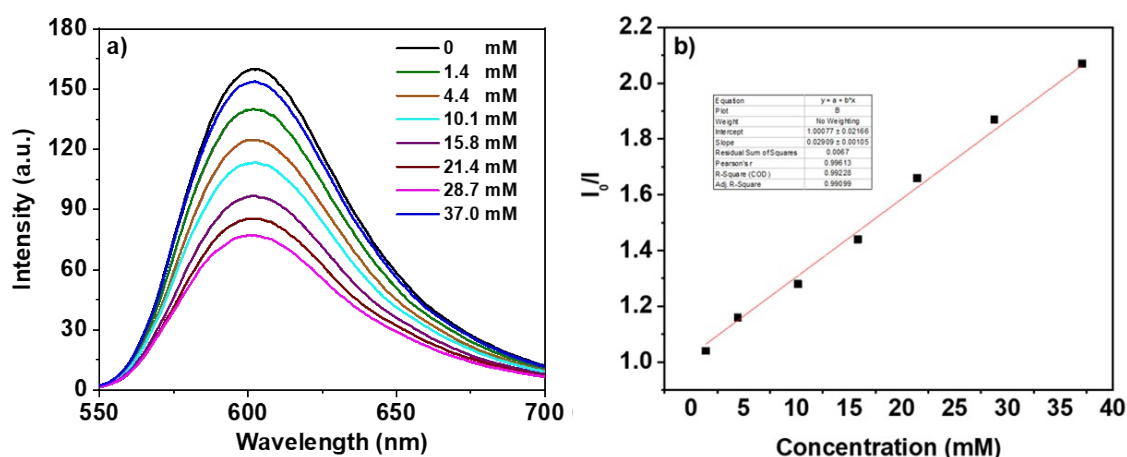

**Fig. S6** (a) Fluorescence emission spectra of **Ir-triad 1** ( $\lambda_{\text{ex}} = 450 \text{ nm}$ ) and its intensity quenching by addition of successive aliquots of quencher (*N,N*-dimethylaniline), (b) Stern-Volmer quenching of **Ir-triad 1** showing a linear correlation with increasing quencher concentration.

## 6. Photocatalysis

### General procedures for the synthesis of products

To a 10 mL schlenk tube, *N,N*-dimethylaniline **2a-2b** (0.23 mmol), maleimide **3a-3c** (0.11 mmol), **Ir-triad 1** (5 mol%) and  $\text{CH}_3\text{CN}/\text{THF}$  (1:6)) were added. The solution was irradiated under blue LED (450 nm) at room temperature in open air. After 17 h, upon completion of the reaction, the solvent was removed using rotary evaporator. The residue was then subjected to

silica gel chromatography using a hexane/EtOAc (10:1) mixture as the eluent to isolate the desired product (s).

**Procedures for the synthesis of 4a using compound 6 as photocatalyst.** Substrates *N,N*-dimethylaniline (**2a**, 0.23 mmol) and *N*-phenylmaleimide (**3a**, 0.11 mmol), compound **6** (5 mol%) and CH<sub>3</sub>CN/THF (1:6) were taken in 10 mL schlenk tube. The reaction mixture was irradiated under blue LED for 17 h in open air. The obtained residue was then subjected to silica gel chromatography using a hexane/EtOAc (10:1) mixture as the eluent and product **4a** was obtained with 32% yield.

#### Reaction under green LED (515 nm)

Following the aforementioned procedure, substrates *N,N*-dimethylaniline (**2a**, 0.23 mmol), and *N*-phenylmaleimide (**3a**, 0.11 mmol) were subjected to the reaction under green light for 17 h. The product (**4a**) was obtained with 83% yield.

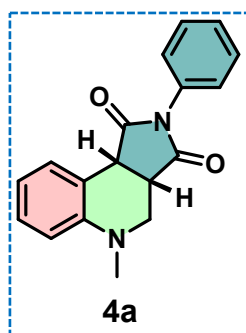

**(3a*S*,9b*R*)-5-methyl-2-phenyl-3a,4,5,9b-tetrahydro-1*H*-pyrrolo[3,4-*c*]quinoline-1,3(2*H*)-dione (4a)**

**Yield:** 32% (using **6** as photocatalyst)

**Yield:** 82% (using **Ir-triad 1** as photocatalyst and blue LED)

**Yield:** 83% (using **Ir-triad 1** as photocatalyst and green LED)

**<sup>1</sup>H NMR of compound 4a (400 MHz, CDCl<sub>3</sub>) δ (ppm):** 7.53 (d, *J* = 8 Hz, 1 H), 7.43 (t, *J* = 8 Hz, 2 H), 7.36 (d, *J* = 4 Hz, 1 H), 7.28-7.22 (m, 3 H), 6.91 (t, *J* = 8 Hz, 1 H), 6.75 (d, *J* = 8 Hz, 1 H), 4.16 (d, *J* = 12 Hz, 1 H), 3.61 (dd, *J* = 12, 1 H), 3.56-3.52 (m, 1 H), 3.13 (dd, *J* = 8, 4 Hz, 1 H), 2.84 (s, 3 H).

$^{13}\text{C}$  NMR of compound 4a (100 MHz,  $\text{CDCl}_3$ )  $\delta$  (ppm): 177.85, 175.92, 148.65, 132.12, 130.47, 129.13, 128.83, 128.65, 126.50, 119.80, 118.67, 112.67, 50.80, 43.72, 42.28, 39.57.

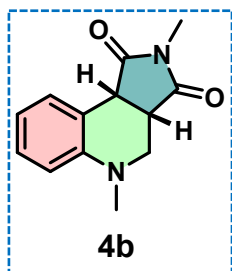

(3a*S*,9b*R*)-2,5-dimethyl-3a,4,5,9b-tetrahydro-1*H*-pyrrolo[3,4-*c*]quinoline-1,3(2*H*)-dione (4b)

Yield: 80%

$^1\text{H}$  NMR of compound 4b (400 MHz,  $\text{CDCl}_3$ )  $\delta$  (ppm): 7.48 (d,  $J = 8$  Hz, 1 H), 7.21 (t,  $J = 8$  Hz, 1 H), 6.89 (t,  $J = 8$  Hz, 1 H), 6.70 (d,  $J = 8$  Hz, 1 H), 4.00 (d,  $J = 12$  Hz, 1 H), 3.54 (dd,  $J = 12$  Hz, 1 H), 3.38-3.35 (m, 1 H), 3.04 (dd,  $J = 8, 4$  Hz, 1 H), 2.99 (s, 3 H), 2.79 (s, 3 H).

$^{13}\text{C}$  NMR of compound 4b (100 MHz,  $\text{CDCl}_3$ )  $\delta$  (ppm): 178.93, 176.98, 148.56, 130.34, 128.74, 119.78, 118.84, 112.63, 50.63, 43.77, 42.18, 39.54, 29.85.

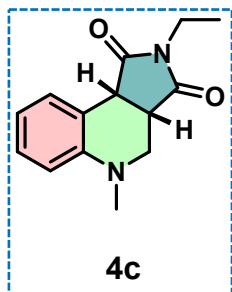

(3a*S*,9b*R*)-2-ethyl-5-methyl-3a,4,5,9b-tetrahydro-1*H*-pyrrolo[3,4-*c*]quinoline-1,3(2*H*)-dione (4c)

Yield: 71%

$^1\text{H}$  NMR of compound 4c (400 MHz,  $\text{CDCl}_3$ )  $\delta$  (ppm): 7.48 (d,  $J = 8$  Hz, 1 H), 7.21 (t,  $J = 8$  Hz, 1 H), 6.88 (d,  $J = 8$  Hz, 1 H), 6.70 (d,  $J = 8$  Hz, 1 H), 3.97 (d,  $J = 8$  Hz, 1 H), 3.59-3.48 (m, 3 H), 3.37-3.33 (m, 1 H), 3.02 (s, 1 H), 2.80 (s, 3 H), 1.14 (t,  $J = 8$  Hz, 3 H).

$^{13}\text{C}$  NMR of compound 4c (100 MHz,  $\text{CDCl}_3$ )  $\delta$  (ppm): 178.50, 176.56, 148.44, 130.22, 128.53, 119.60, 118.84, 112.45, 50.65, 43.48, 41.99, 39.40, 34.28, 12.98.

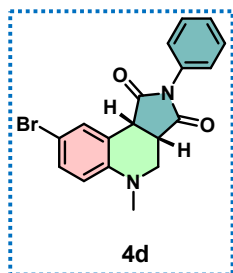

**(3a*S*,9b*R*)-8-bromo-5-methyl-2-phenyl-3a,4,5,9b-tetrahydro-1*H*-pyrrolo[3,4-c]quinoline-1,3(2*H*)-dione (4d)**

**Yield:** 83%

**<sup>1</sup>H NMR of compound 4d (400 MHz, CDCl<sub>3</sub>) δ (ppm):** 7.65 (d, *J* = 4 Hz, 1 H), 7.44 (t, *J* = 8 Hz, 2 H), 7.39 – 7.30 (m, 2 H), 7.27-7.26 (m, 2 H), 6.61 (d, *J* = 8 Hz, 1 H), 4.11 (d, *J* = 8 Hz, 1 H), 3.61 (dd, *J* = 8, 4 Hz, 1 H), 3.56-3.52 (m, 1 H), 3.11 (dd, *J* = 8, 4 Hz, 1 H), 2.82 (s, 3 H).

**<sup>13</sup>C NMR of compound 4d (100 MHz, CDCl<sub>3</sub>) δ (ppm):** 177.36, 147.62, 132.88, 131.97, 131.61, 129.20, 128.79, 126.44, 120.49, 114.36, 111.85, 50.52, 43.43, 41.93, 39.60.

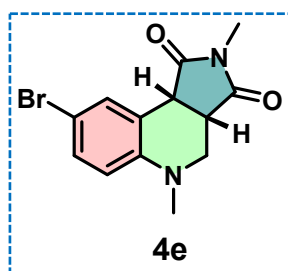

**(3a*S*,9b*R*)-8-bromo-2,5-dimethyl-3a,4,5,9b-tetrahydro-1*H*-pyrrolo[3,4-c]quinoline-1,3(2*H*)-dione (4e)**

**Yield:** 76%

**<sup>1</sup>H NMR of compound 4e (400 MHz, CDCl<sub>3</sub>) δ (ppm):** 7.59 (s, 1 H), 7.30-7.27 (m, 1 H), 6.56 (d, *J* = 8 Hz, 1 H), 3.95 (d, *J* = 12 Hz, 1 H), 3.52 (dd, *J* = 12, 1 H), 3.38-3.34 (m, 1 H), 3.04-3.02 (m, 1 H), 2.99 (s, 3 H), 2.77 (s, 3 H).

**<sup>13</sup>C NMR of compound 4e (100 MHz, CDCl<sub>3</sub>) δ (ppm):** 178.45, 176.28, 147.56, 132.74, 131.48, 120.69, 114.31, 111.82, 50.38, 43.48, 41.83, 39.56, 25.60.

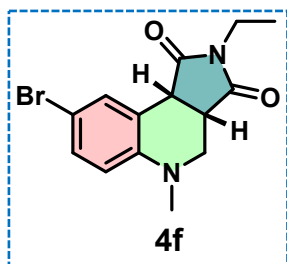

**(3a*S*,9b*R*)-8-bromo-2-ethyl-5-methyl-3a,4,5,9b-tetrahydro-1*H*-pyrrolo[3,4-*c*]quinoline-1,3(2*H*)-dione (4f)**

**Yield:** 79% <sup>1</sup>H NMR of compound 4f (400 MHz, CDCl<sub>3</sub>) δ (ppm): 7.59-7.58 (m, *J* = 1 Hz, 1 H), 7.30- 7.27 (m, 1 H), 6.56 (d, *J* = 12 Hz, 1 H), 3.91 (d, *J* = 12 Hz, 1 H), 3.60-3.52 (m, 2 H), 3.50-3.47 (m, 2.7 Hz, 1 H), 3.36-3.30 (m, 1 H), 3.02 (dd, *J* = 8, 4 Hz, 1 H), 2.78 (s, 3 H), 1.14 (t, *J* = 8 Hz, 3 H).

<sup>13</sup>C NMR of compound 4f (100 MHz, CDCl<sub>3</sub>) δ (ppm): 178.16, 175.99, 147.57, 132.77, 131.42, 120.84, 114.28, 111.79, 50.54, 43.33, 41.78, 39.56, 34.53, 13.10.

**Calculation of excited-state oxidation potential and reduction potential of Ir-triad 1**

The excited-state oxidation potential ( $E_{ox}^*$ ) and reduction potential ( $E_{red}^*$ ) were calculated using the following equations<sup>S9</sup>

$$E_{ox}^* = E_{ox} - E_{0,0} \quad (S5)$$

$$E_{red}^* = E_{red} + E_{0,0} \quad (S6)$$

here  $E_{ox}$  and  $E_{red}$  are the half-oxidation potential and half-reduction potential, respectively, and  $E_{0,0}$  is the lowest energy electronic transition between the lowest vibrational states of the ground and the first excited state and calculated by taking the intersection point of normalized absorption and normalized emission spectra.

**For Ir-triad 1**

$$E_{ox} = 0.85 \text{ V}, E_{red} = -0.45 \text{ V}, E_{0,0} = 2.24 \text{ eV}$$

Accordingly,  $E_{ox}^*$  and  $E_{red}^*$  were calculated to be -1.39 V and 1.79 V respectively.

**$^1\text{H}$  NMR of compound 4a in  $\text{CDCl}_3$**

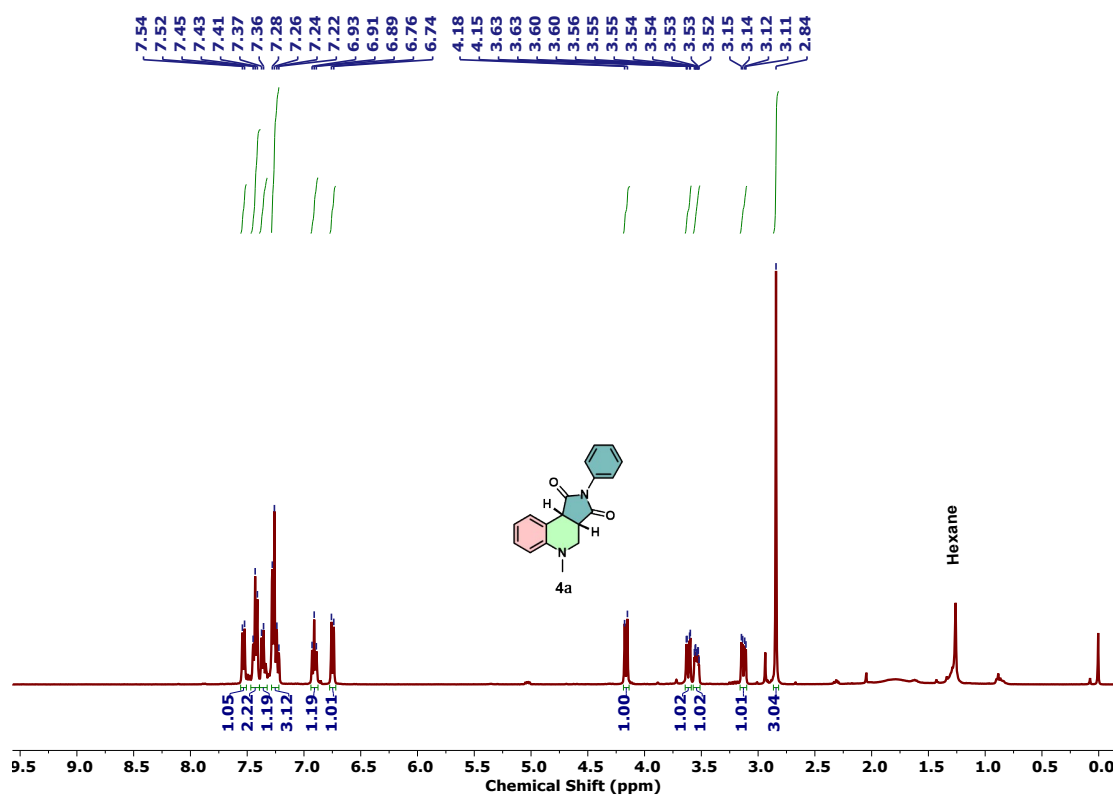

**$^1\text{H}$  NMR of compound 4a in  $\text{CDCl}_3$  using compound 6 as photocatalyst**

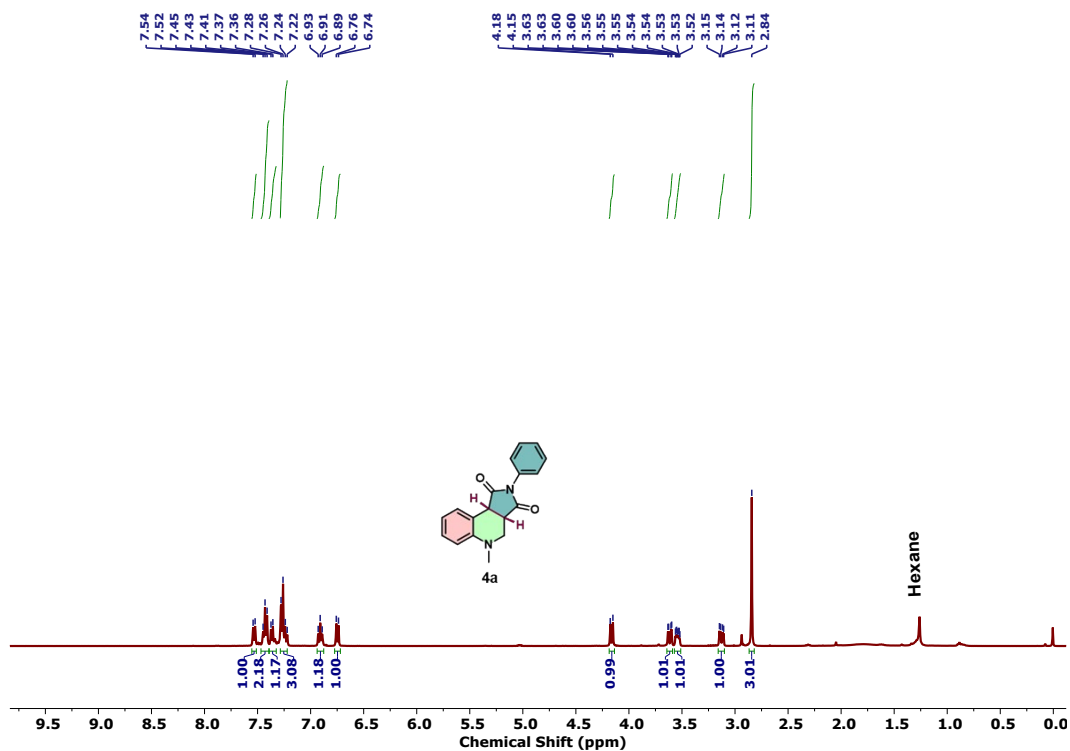

<sup>13</sup>C NMR of compound 4a in CDCl<sub>3</sub>

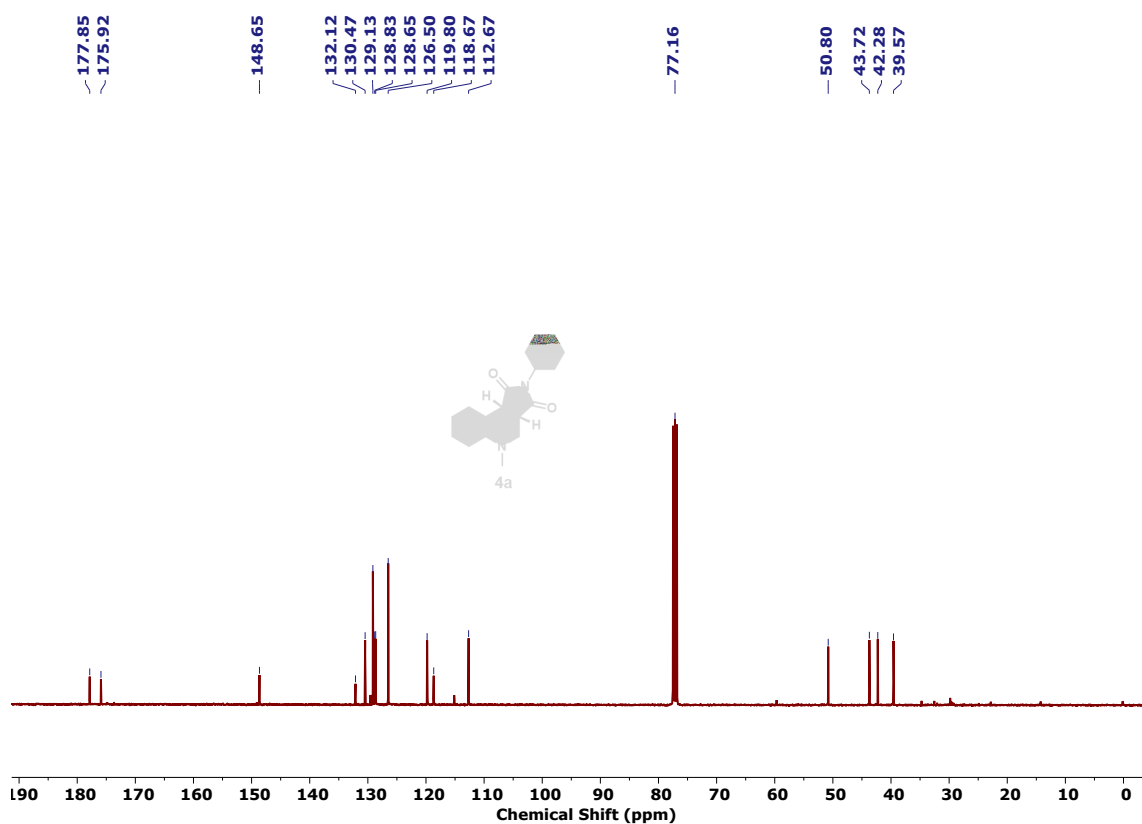

<sup>1</sup>H NMR of compound 4b in CDCl<sub>3</sub>



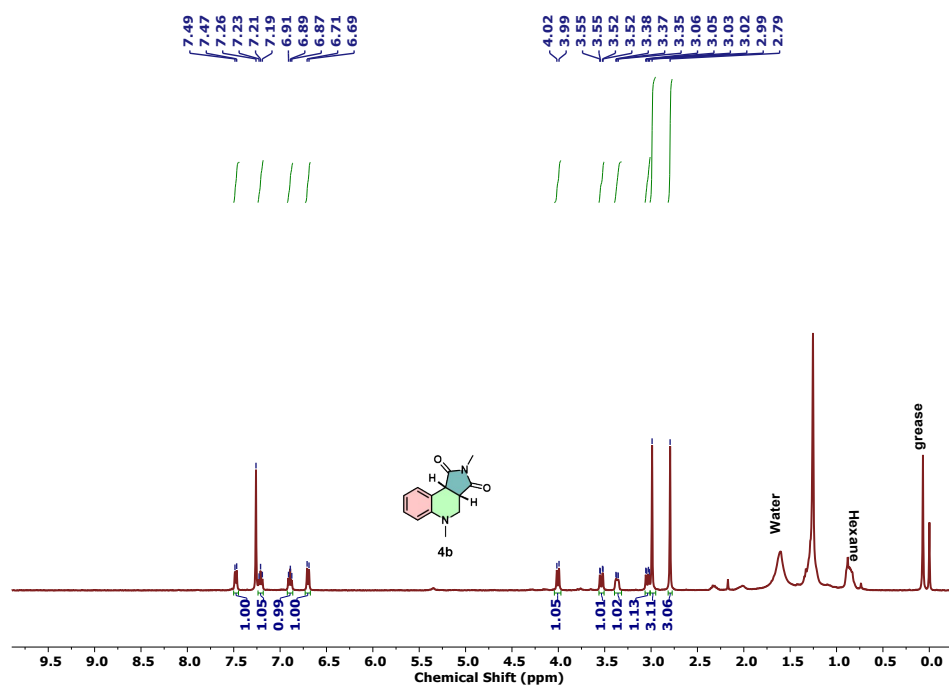

$^{13}\text{C}$  NMR of compound 4b in  $\text{CDCl}_3$

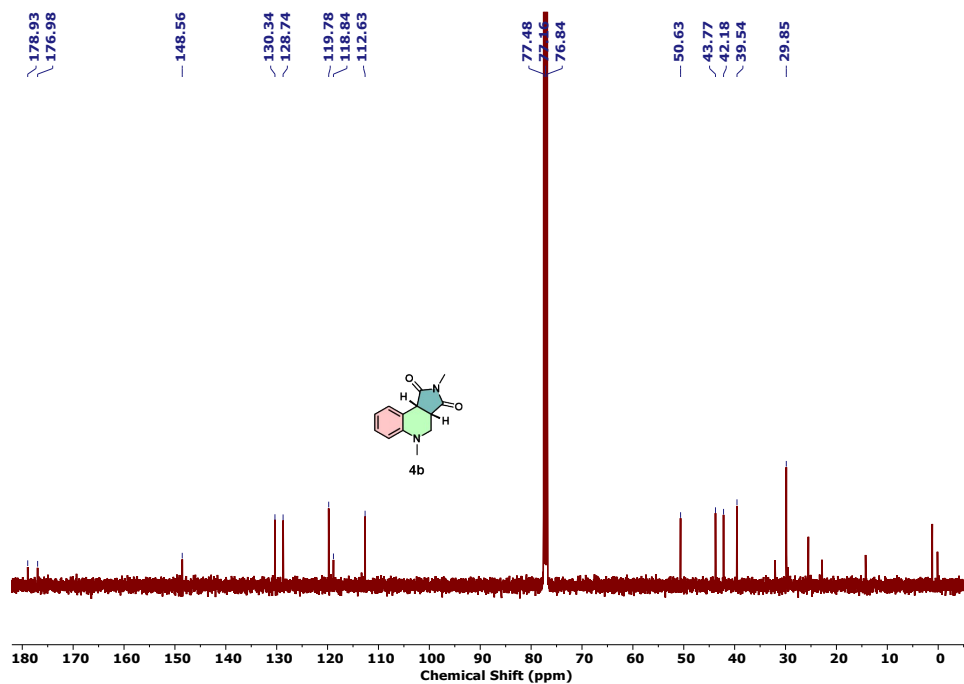

$^1\text{H}$  NMR of compound 4c in  $\text{CDCl}_3$

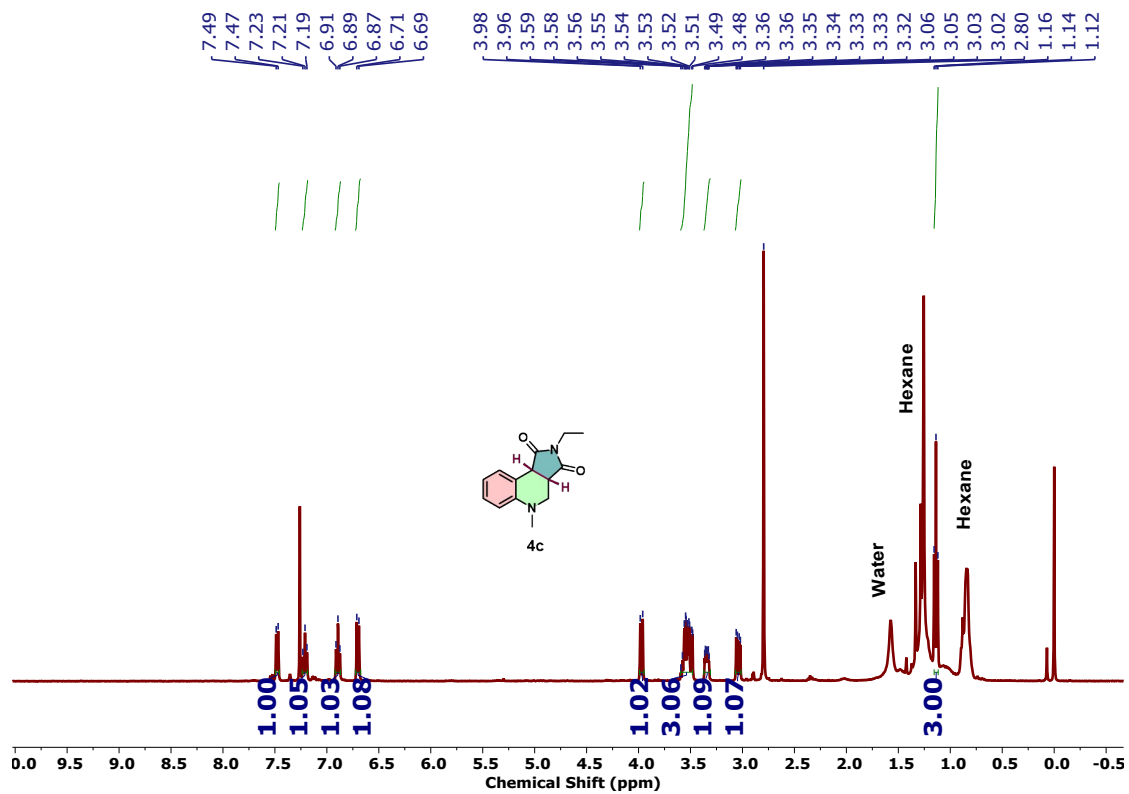

7.49, 7.47, 7.23, 7.21, 7.19, 6.91, 6.89, 6.87, 6.71, 6.69, 3.98, 3.96, 3.59, 3.58, 3.56, 3.55, 3.54, 3.53, 3.52, 3.51, 3.49, 3.48, 3.36, 3.36, 3.35, 3.34, 3.33, 3.33, 3.32, 3.06, 3.05, 3.03, 3.02, 2.80, 1.16, 1.14, 1.12

**<sup>13</sup>C NMR of compound 4c in CDCl<sub>3</sub>**

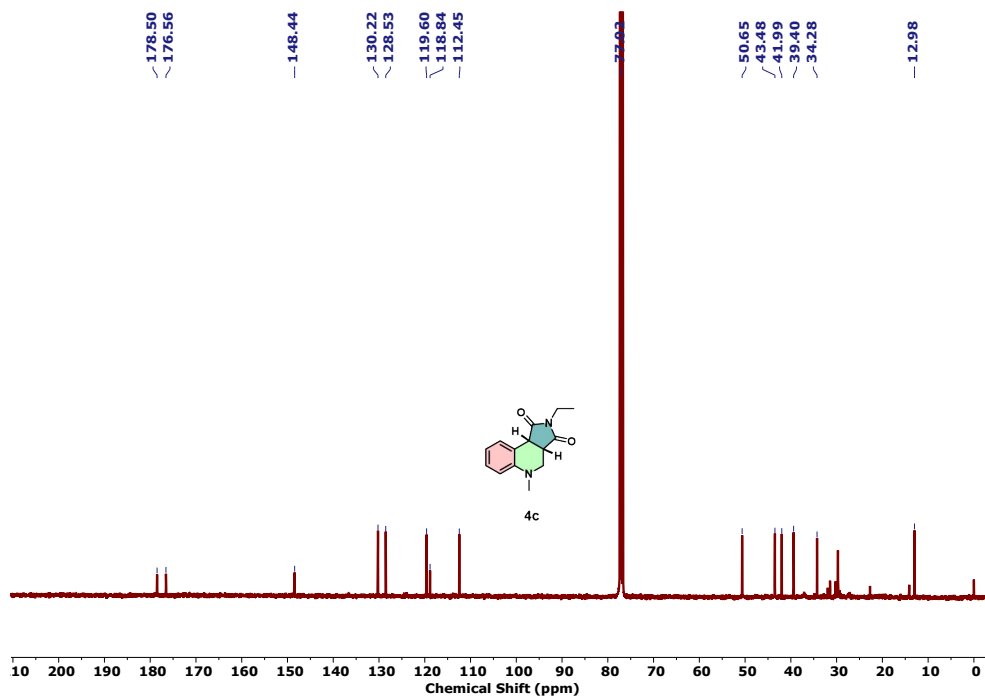

### $^1\text{H}$ NMR of compound 4d in $\text{CDCl}_3$

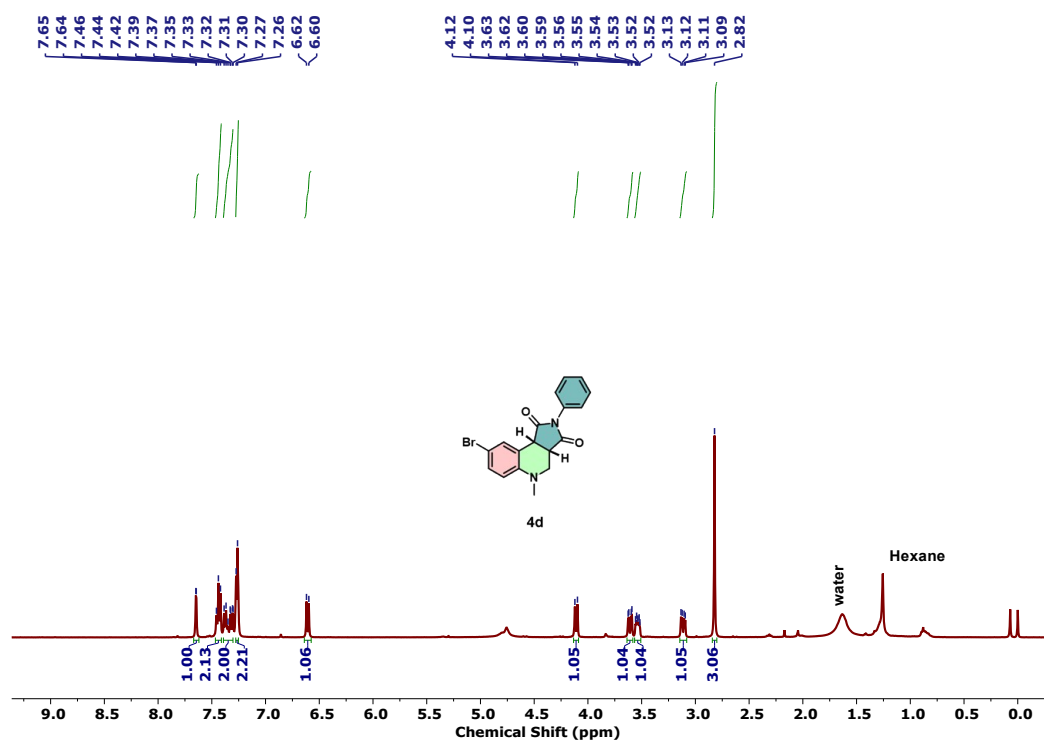

### $^{13}\text{C}$ NMR of compound 4d in $\text{CDCl}_3$

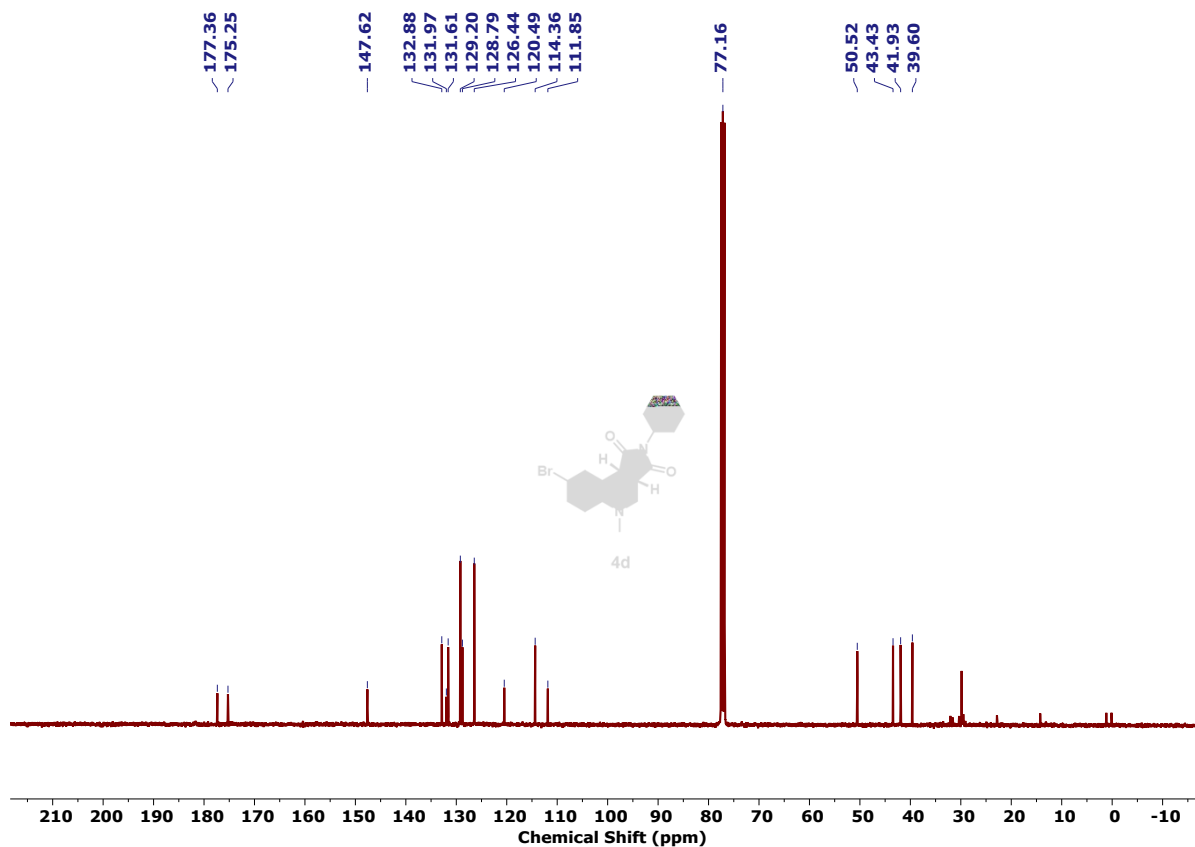

<sup>1</sup>H NMR of compound 4e in CDCl<sub>3</sub>

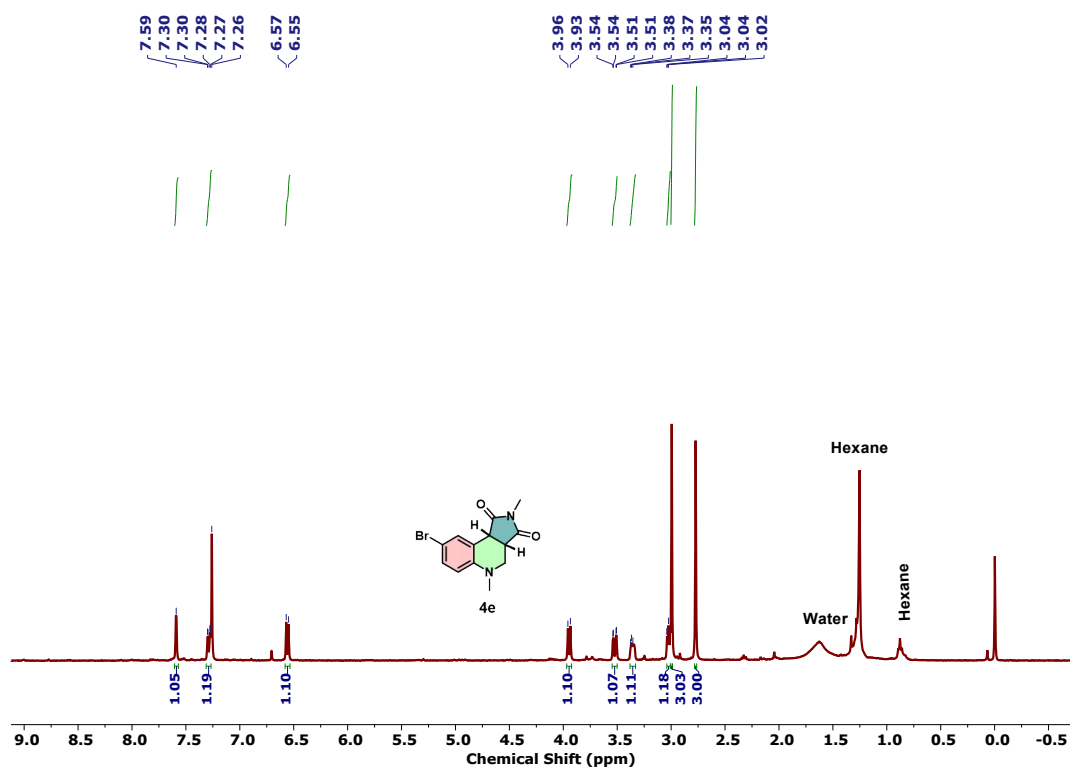

<sup>1</sup>H NMR of compound 4e in CDCl<sub>3</sub>

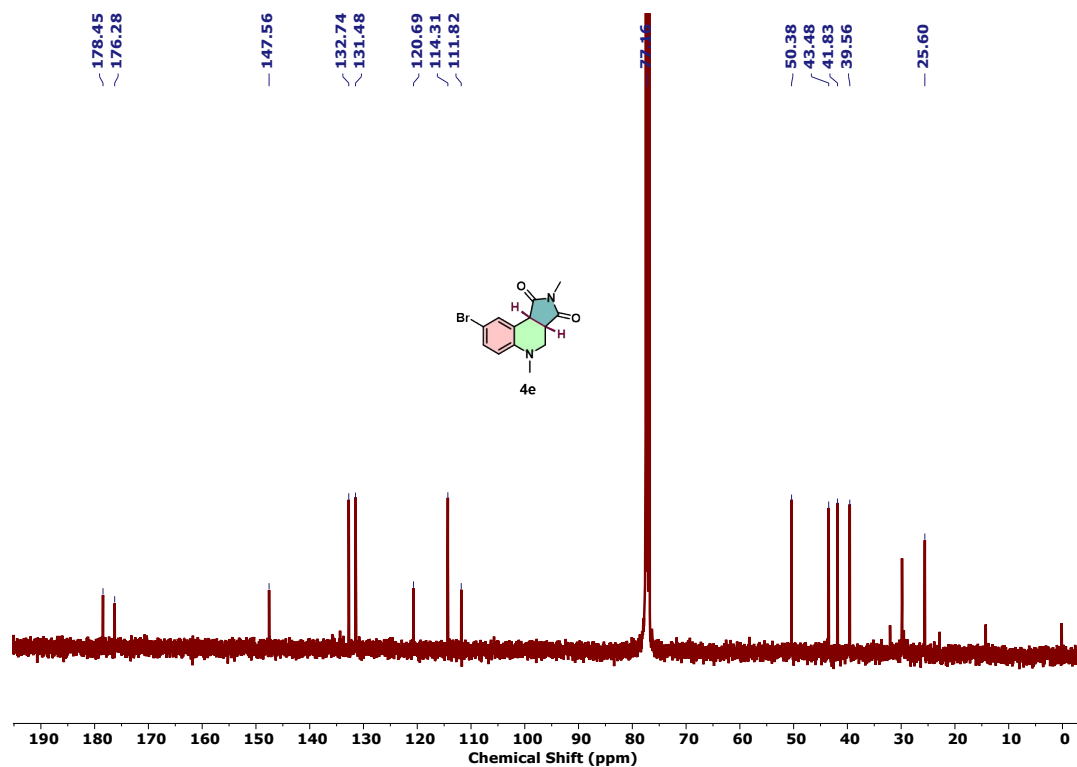

<sup>1</sup>H NMR of compound 4f in CDCl<sub>3</sub>

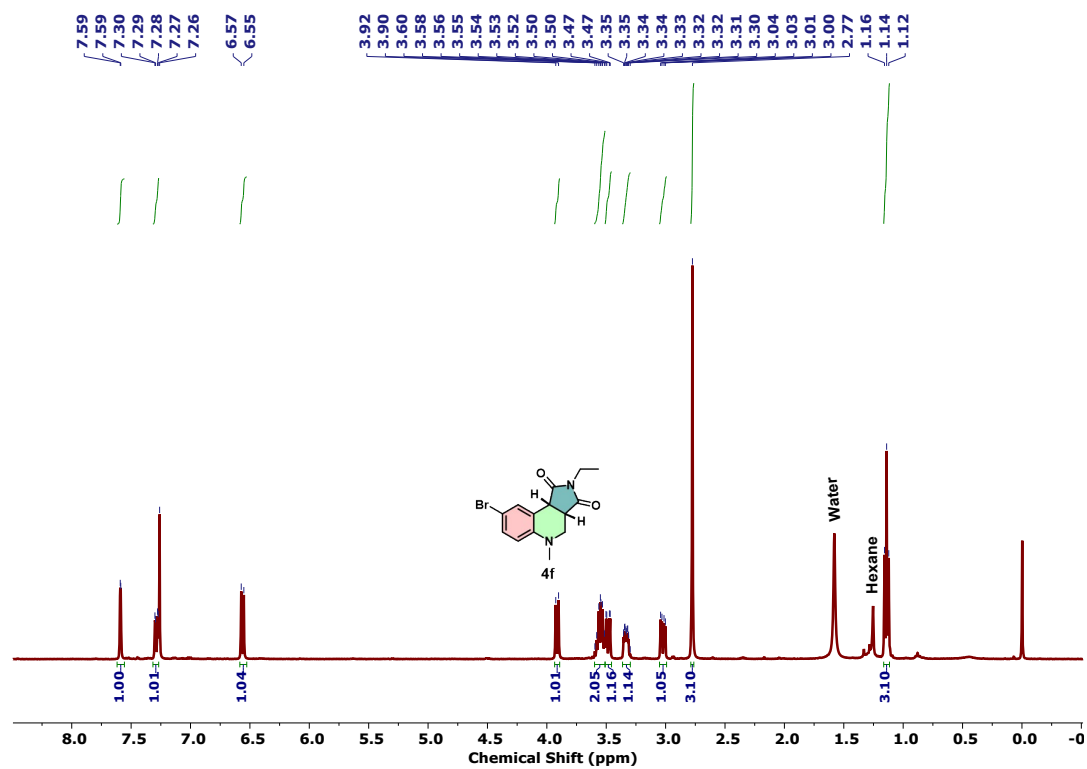

<sup>1</sup>H NMR of compound 4f in CDCl<sub>3</sub>

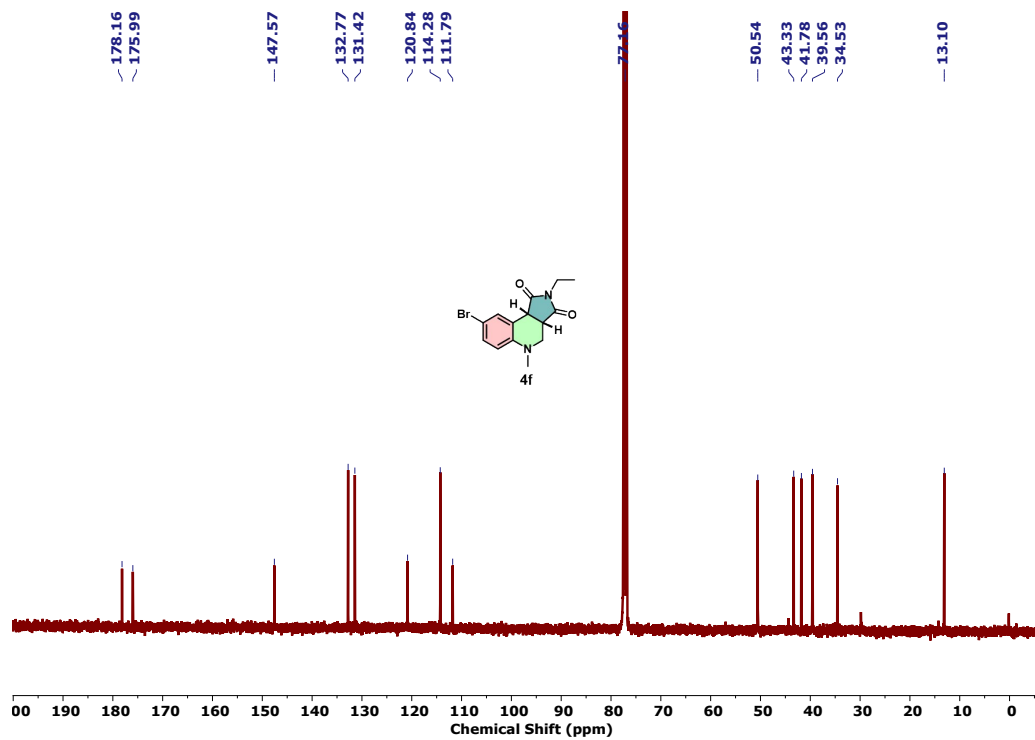

### <sup>1</sup>H NMR and absorption spectra of recovered Ir-triad 1 after photocatalysis

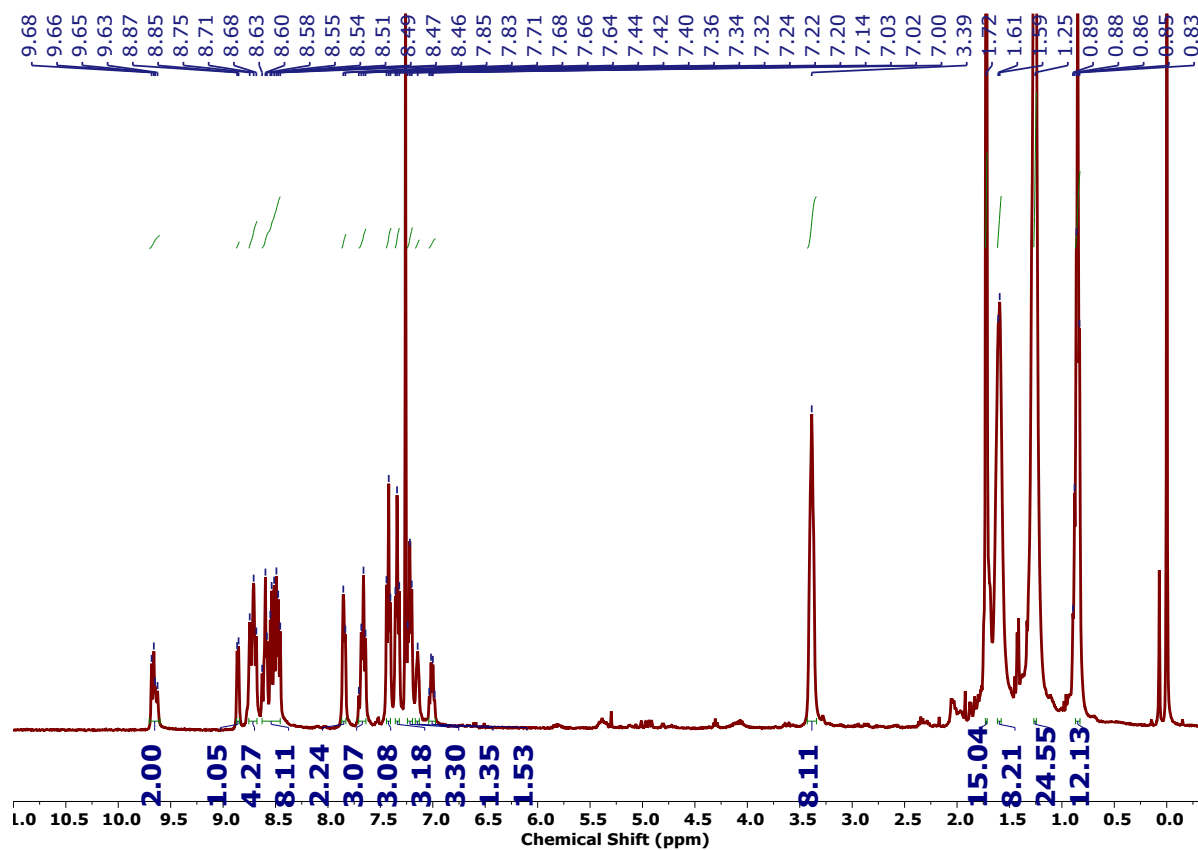

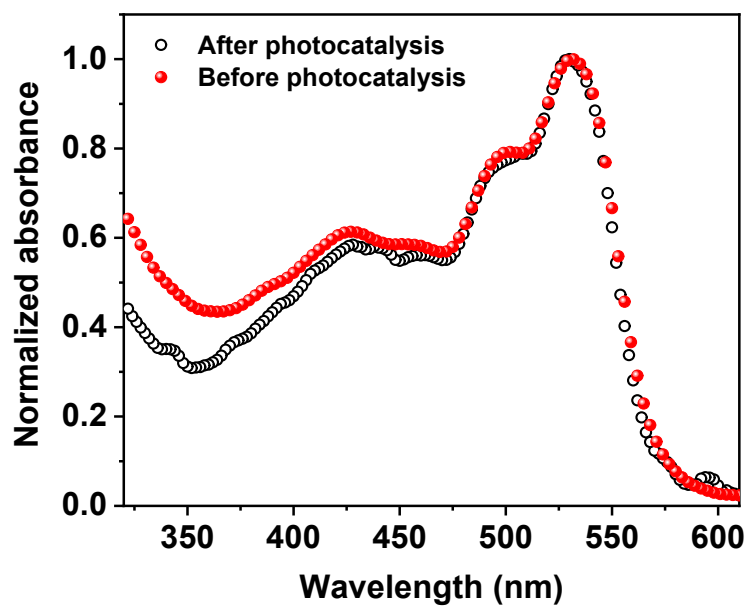

**Fig. S7** Absorption spectra of **Ir-triad 1** before and after photocatalysis.

### Detection of H<sub>2</sub>O<sub>2</sub>

The generation of H<sub>2</sub>O<sub>2</sub> in the photocatalytic reaction was detected according to the following iodometric reaction:<sup>S10</sup>

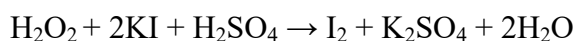

**Procedure:** After completing the synthesis of compound **4a**, 1 mL aliquot of the filtrate (b) was taken and subsequently, 3 mL of 3.5 M H<sub>2</sub>SO<sub>4</sub> solution and 1 mL of 0.1 M KI solution (c) were successively added to the solution (a). This addition led to a change in dark yellow colour with the release of I<sub>2</sub> as indicated in (a). Thus, this reaction demonstrates the generation of H<sub>2</sub>O<sub>2</sub>, consistent with the mechanistic pathway described in the literature.

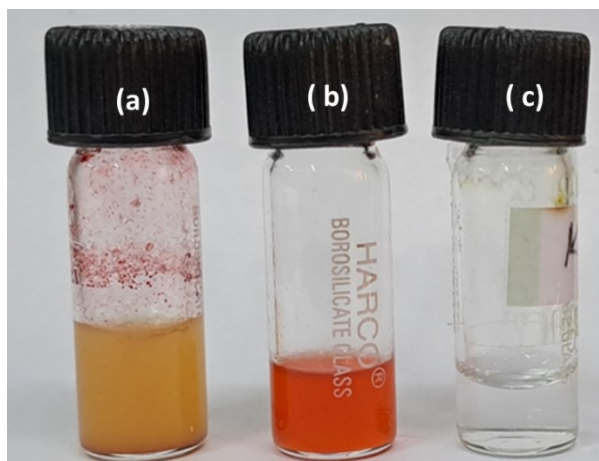

**Fig. S8** Iodometric detection of  $\text{H}_2\text{O}_2$  from the aliquot of the photocatalytic reaction.

## 7. References

- S1. Z. Li, C. Gelbaum, J. S. Fisk, B. Holden, A. Jaganathan, G. T. Whiteker, P. Pollet and C. L. Liotta, Aqueous Suzuki Coupling Reactions of Basic Nitrogen-Containing Substrates in the Absence of Added Base and Ligand: Observation of High Yields under Acidic Conditions, *J. Org. Chem.*, 2016, **81**, 8520–8529.
- S2. L. I. Hernández, R. Godin, J. J. Bergkamp, M. J. Llansola Portolés, B. D. Sherman, J. Tomlin, G. Kodis, D. D. Méndez-Hernández, S. Bertolotti, C. A. Chesta, E. Mariño-Ochoa, A. L. Moore, T. A. Moore, G. Cosa and R. E. Palacios, Spectral and Photosensitization of  $\text{TiO}_2$  Nanoparticles in Reverse Micelles by Perylenes, *J. Phys. Chem. B*, 2013, **117**, 4568–4581.
- S3. F. Liu, T. Wu, J. Cao, S. Cui, Z. Yang, X. Qiang, S. Sun, F. Song, J. Fan, J. Wang and X. Peng, Ratiometric Detection of Viscosity Using a Two-Photon Fluorescent Sensor, *Chem. Eur. J.*, 2013, **19**, 1548–1553.
- S4. S. Sharma, S. Srinivas, S. Rakshit and S. Sengupta, Aminoindole and naphthalimide based charge transfer fluorescent probes for pH sensing and live cell imaging, *Org. Biomol. Chem.*, 2022, **20**, 9422–9430.



- S5. A. M. Brouwer, Standards for photoluminescence quantum yield measurements in solution (IUPAC Technical Report), *Pure Appl. Chem.*, 2011, **83**, 2213–2228.
- S6. G. Chen, H. Sasabe, Y. Sasaki, H. Katagiri, X. F. Wang, T. Sano, Z. Hong, Y. Yang and J. Kido, A Series of Squaraine Dyes: Effects of Side Chain and the Number of Hydroxyl Groups on Material Properties and Photovoltaic Performance, *Chem. Mater.*, 2014, **26**, 1356–1364.
- S7. K. Rani, U. K. Pandey and S. Sengupta, Efficient electron transporting and panchromatic absorbing FRET cassettes based on aza-BODIPY and perylenediimide towards multiple metal FRET-Off sensing and ratiometric temperature sensing, *J. Mater. Chem. C*, 2021, **9**, 4607–4618.
- S8. S. Halder, S. Mandal, A. Biswas and D. Adhikari, Unlocking the photo-dehydrogenation ability of naphthalene monoimide towards the synthesis of quinazolinones, *Green Chem.*, 2023, **25**, 2840-2845.
- S9. S. Sharma and S. Sengupta, Twisted organic TADF triads based on a diindolocarbazole donor for efficient photoisomerization of stilbene and photoarylation of heteroarenes, *Org. Chem. Front.*, 2023, **10**, 6087–6095.
- S10. H. Pang, D. Huang, Y. Zhu, X. Zhao and Y. Xiang, One-pot cascade construction of nonsubstituted quinoline-bridged covalent organic frameworks, *Chem. Sci.*, 2023, **14**, 1543–1550.
